# Supplementary material for: Microwave-assisted synthesis of 4-oxo-2-butenoic acids by aldol-condensation of glyoxylic acid
Source: Royal Society of Chemistry journal article supplement (doi:10.1039/d1ra05539a), 2021-01-01
Supplement: d1ra05539a1.pdf [file d1ra05539a1.pdf]

## Microwave-assisted synthesis of 4-oxo-2-butenic acids by aldol-condensation of glyoxylic acid

Mélanie Uguen,<sup>†a\*</sup> Conghao Gai,<sup>†b</sup> Lukas J. Sprenger<sup>a</sup>, Hang Liu<sup>b</sup> Andrew G. Leach<sup>c</sup> and Michael J. Waring<sup>a\*</sup>

<sup>a</sup>Cancer Research UK Drug Discovery Unit, Newcastle University Centre for Cancer, Chemistry, School of Natural and Environmental Sciences, Newcastle University, Bedson Building, Newcastle upon Tyne NE1 7RU, U.K; <sup>b</sup>Organic Chemistry Group, College of Pharmacy, Naval Medical University, Shanghai, P. R. China; <sup>c</sup>Division of Pharmacy and Optometry, School of Health Sciences, University of Manchester, Manchester M13 9PT, U.K. [orcid.org/0000-0003-1325-8273](https://orcid.org/0000-0003-1325-8273); <sup>†</sup>Co-authors.

### Supplementary information

#### Content

|                                                                                                                                                           |   |
|-----------------------------------------------------------------------------------------------------------------------------------------------------------|---|
| 1. Table S1. Optimisation of the transformation of 4-methoxyacetophenone into 1 via aldol-condensation. ....                                              | 2 |
| 2. Figure S1. Crude NMR of TsOH-promoted aldol-condensation on pentan-2-one. A mixture of desired product 15 and side-product 19 1:1.5 was obtained. .... | 3 |
| 3. Table S2. Calculated HOMO and LUMO energies for different methyl ketone substrates and glyoxylic acid. ....                                            | 4 |
| 4. General Information for the Synthesis .....                                                                                                            | 5 |
| 5. Analytical Equipment .....                                                                                                                             | 5 |
| 6. NMR spectra.....                                                                                                                                       | 6 |

**1. Table S1. Optimisation of the transformation of 4-methoxyacetophenone into 1 via aldol-condensation.**

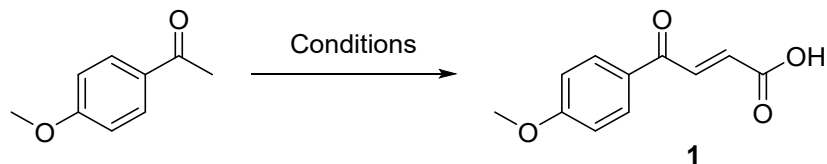

| Entry | Conditions                                                                                                                                                                  | Yield after purification         |
|-------|-----------------------------------------------------------------------------------------------------------------------------------------------------------------------------|----------------------------------|
| 1     | 1.5 eq. glyoxylic acid monohydrate, 1.7 eq. NaH 60% dispersion in mineral oil, DMSO, 80 °C, 18 h                                                                            | Low conversion <sup>1</sup>      |
| 2     | 1.5 eq. glyoxylic acid monohydrate, 1.7 eq. NaH 60% dispersion in mineral oil, DMSO, 80 °C, 18h, then 1.5 eq. NaH 60% dispersion in mineral oil, 1.5 eq. TsCl, 80 °C, 5 min | Low conversion <sup>1</sup>      |
| 3     | 1.5 eq. glyoxylic acid monohydrate<br>1.7 eq. LiOH monohydrate<br>MeOH, 80°C, 18h                                                                                           | Moderate conversion <sup>2</sup> |
| 4     | 3.0 eq. glyoxylic acid monohydrate,<br>1.0 eq. pyrrolidine, 1.0 eq. acetic acid,<br>MeOH, MW, 80°C, 8 h                                                                     | Moderate conversion <sup>2</sup> |
| 5     | 3.0 eq. glyoxylic acid monohydrate<br>3.0 eq. TsCl, dioxane, 80°C, 18 h                                                                                                     | Moderate conversion <sup>2</sup> |
| 6     | 3.0 eq. glyoxylic acid monohydrate<br>3.0 eq. Tf <sub>2</sub> O, dioxane, 80°C, 18 h                                                                                        | No product                       |
| 7     | 3.0 eq. glyoxylic acid monohydrate<br>1.0 eq. TsOH monohydrate<br>dioxane, 80°C, 48 h                                                                                       | 70%                              |

<sup>1</sup>Low conversion: < 10% desired product by UV and/or ELSD LC-MS analysis. <sup>2</sup>Moderate conversion: < 50% desired product by UV and/or ELSD LC-MS analysis.

2. Figure S1. Crude NMR of TsOH-promoted aldol-condensation on pentan-2-one. A mixture of desired product 15 and side-product 19 1:1.5 was obtained.

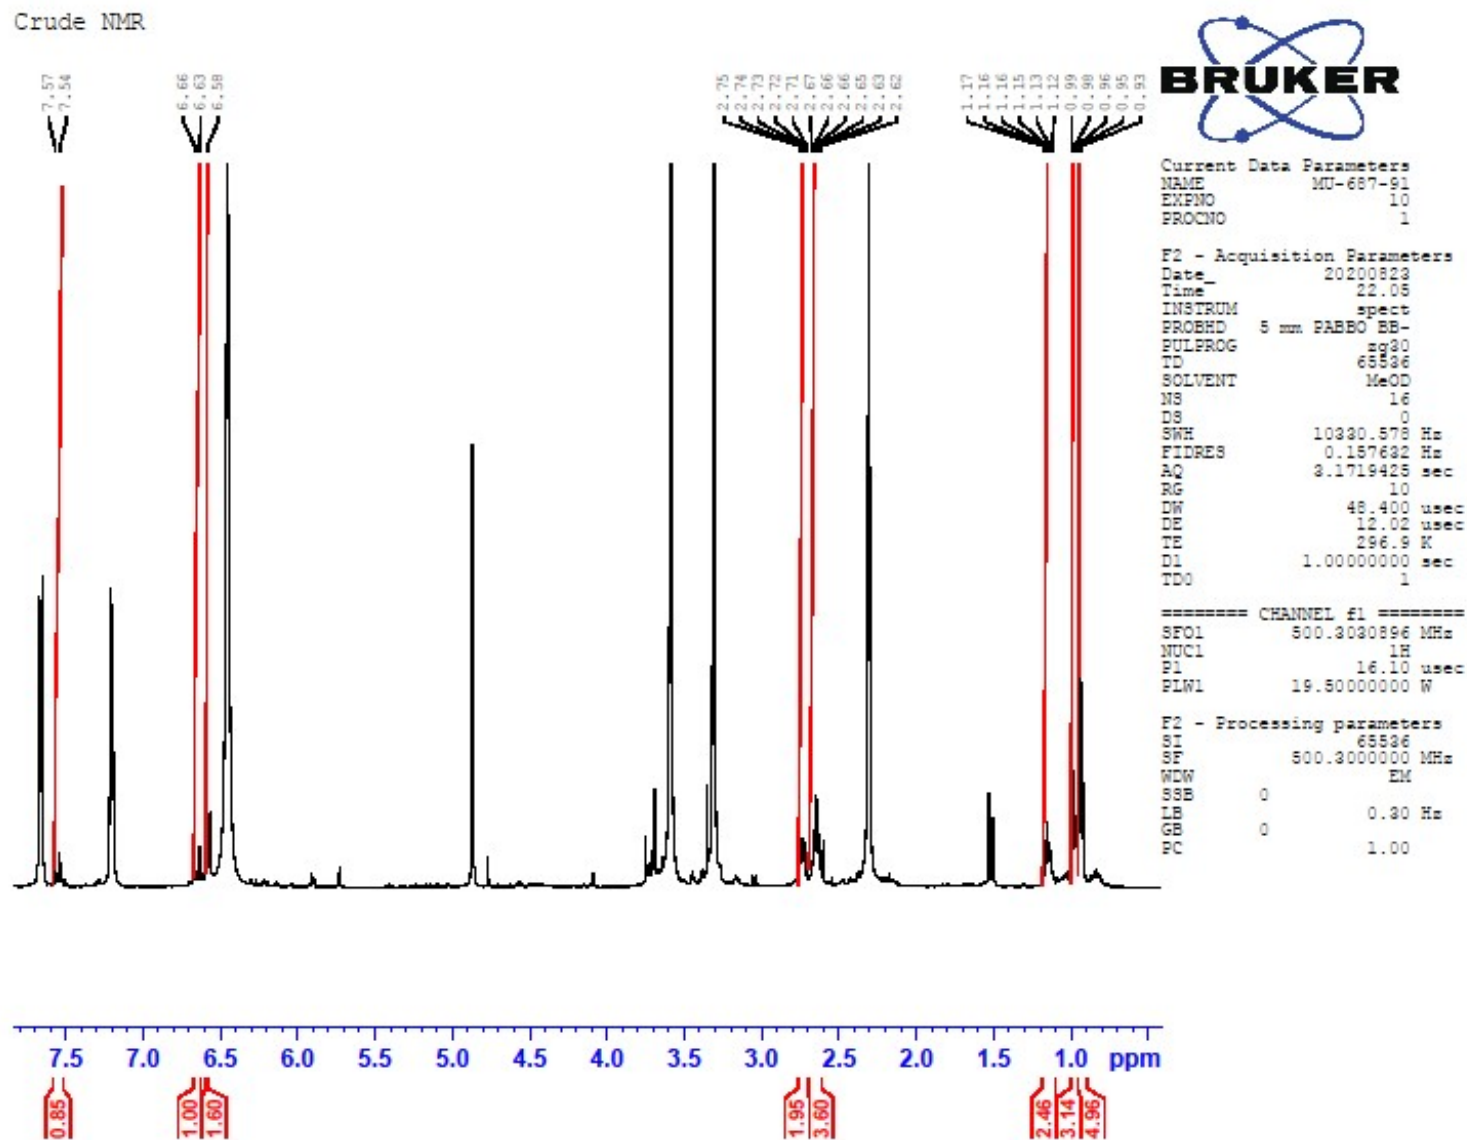

### 3. Table S2. Calculated HOMO and LUMO energies for different methyl ketone substrates and glyoxylic acid.

Calculations employed the RHF/6-31+G\*\* level of theory in the Gaussian09 suite of programs. Geometries were optimised and frequencies computed to verify that they are minima.

| Methyl ketone substituent | Substituent class | ENOL HOMO | ENOL LUMO | ENOLATE HOMO | ENOLATE LUMO | ENAMINE_HOMO | ENAMINE_LUMO |
|---------------------------|-------------------|-----------|-----------|--------------|--------------|--------------|--------------|
| cyclohexyl                | aliphatic         | -0.33597  | 0.07163   | -0.08481     | 0.16325      | -0.29239     | 0.06944      |
| cyclopropyl               | aliphatic         | -0.32685  | 0.06935   | -0.08144     | 0.18209      | -0.2852      | 0.07097      |
| isopropyl                 | aliphatic         | -0.33841  | 0.07206   | -0.08243     | 0.18843      | -0.29357     | 0.07363      |
| n-propyl                  | aliphatic         | -0.33828  | 0.07428   | -0.08121     | 0.17438      | -0.29256     | 0.07546      |
| t-butyl                   | aliphatic         | -0.33857  | 0.07477   | -0.08406     | 0.18351      | -0.30383     | 0.07418      |
| p-methylphenyl            | aromatic          | -0.30309  | 0.06808   | -0.09087     | 0.14946      | -0.28913     | 0.07035      |
| p-ethylphenyl             | aromatic          | -0.30318  | 0.06618   | -0.09156     | 0.14344      | -0.296       | 0.06673      |
| p-fluorophenyl            | aromatic          | -0.31576  | 0.0643    | -0.09751     | 0.1698       | -0.29798     | 0.06697      |
| p-chlorophenyl            | aromatic          | -0.3168   | 0.06266   | -0.1016      | 0.1533       | -0.2998      | 0.06417      |
| p-methoxyphenyl           | aromatic          | -0.29375  | 0.06866   | -0.09049     | 0.14403      | -0.28246     | 0.06718      |
| p-cyanophenyl             | aromatic          | -0.33266  | 0.0507    | -0.11218     | 0.1525       | -0.31016     | 0.05943      |

| Glyoxylic acid | HOMO     | LUMO    |
|----------------|----------|---------|
| Neutral        | -0.45302 | 0.05375 |
| Protonated     | -0.72186 | -0.2152 |

#### **4. General Information for the Synthesis**

Chemicals were purchased from commercial suppliers and used without further purification. Thin layer chromatography (TLC) was performed on aluminium plates coated with 60 F254 silica from Merck. Flash chromatography was carried out using a Biotage SP4, Biotage Isolera or Varian automated flash system with Silicycle or GraceResolve normal phase silica gel pre-packed columns. Fractions were collected at 254 nm or if necessary on all wavelengths between 200 and 400 nm. Microwave irradiation was performed in a Biotage Initiator Sixty in sealed vials (Biotage microwave vials, Type I, Class A borosilicate, 28 mm outer diameter, 26 mm inner diameter, 83 mm long, round-bottom for 5-20 mL of total reaction volume; Biotage microwave vials, 16 mm outer diameter, 14 mm inner diameter, 83 mm long, round-bottom for 2-5 mL of total reaction volume). Reactions were irradiated at 2.45 GHz and were able to reach temperatures between 60 and 250 °C. Heating was at a rate of 2-5 °C/s and the pressure was able to reach 20 bars.

#### **5. Analytical Equipment**

Melting points were measured using a Stuart automatic melting point SMP40 apparatus or a Shanghai ShenGuang WRR apparatus. Fourier Transform InfraRed (FTIR) spectra were measured using an Agilent Cary 630 FTIR or a Bruker TENSOR II FTIR Spectrometer as a neat sample tableting with KBr. The abbreviations for peak description are as follows: b = broad; w = weak; m = medium and s = strong. Ultraviolet (UV) spectra were recorded on a Hitachi U-2900 spectrophotometer or an Agilent Cary 100 UV-Vis spectrophotometer and were performed in ethanol. High resolution mass spectrometry (HRMS) was provided by the ESPRC National Mass Spectrometry Service, University of Wales, Swansea, or the Mass Spectrometry Service, Department of Pharmacy, Naval Medical University and performed by Diya Lyu on an Agilent Technologies 6550 iFunnel Q-TOF LC-MS, or conducted using an Agilent 6550 iFunnel QTOF LC-MS with an Agilent 1260 Infinity UPLC system. The sample was eluted on Acquity UPLC BEH C18 (1.7µm, 2.1 x 50mm) with a flow rate of 0.7 mL/min and run at a gradient of 1.2 min 5-95% 0.1% aq. HCOOH in MeCN.

LC-MS analyses were conducted using a Waters Acquity UPLC system with photo diode array (PDA) and evaporating light scattering detector (ELSD) or using the ESI mass spectra which were performed by Zichao Ding on an Agilent Technologies 6120 Quadrupole LC-MS. When a 2 min gradient was used, the sample was eluted on an Acquity UPLC BEH C18, 1.7 $\mu$ m, 2.1 x 50mm, with a flow rate of 0.6 ml/min using 5-95% 0.1% HCOOH in MeCN. Analytical purity of compounds was determined using Waters XTerra RP18, 5  $\mu$ m (4.6 x 150 mm) column at 1 ml/min using either 0.1% aq. ammonia and MeCN or 0.1% aq. HCOOH and MeCN with a gradient of 5-100% over 15 min. When a 12 min gradient was used, the sample was eluted on ZORBAX Eclipse XDB-C18, 3.5  $\mu$ m, 4.6 x 100 mm, with a flow rate of 0.4 ml/min using 30-70% 0.1% HCOOH in MeCN.

$^1\text{H}$  and  $^{13}\text{C}$  NMR spectra were obtained using a Bruker Avance III 500 spectrometer using a frequency of 500 MHz, and 123 MHz, respectively, or using a Bruker Avance III 600 spectrometer operating at a frequency of 600 MHz, and 150 MHz, respectively.  $^{19}\text{F}$  NMR spectra were acquired using the Bruker Avance III 300 spectrometer using a frequency of 282 MHz. The abbreviations for spin multiplicity are as follows: s = singlet; d = doublet; t = triplet; q = quartet, p = quintuplet, h = sextuplet and m = multiplet. Combinations of these abbreviations are employed to describe more complex splitting patterns (e.g. dd = doublet of doublets).

## 6. NMR spectra

Compound 1

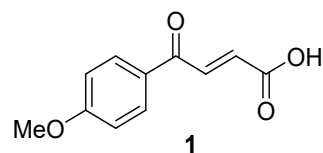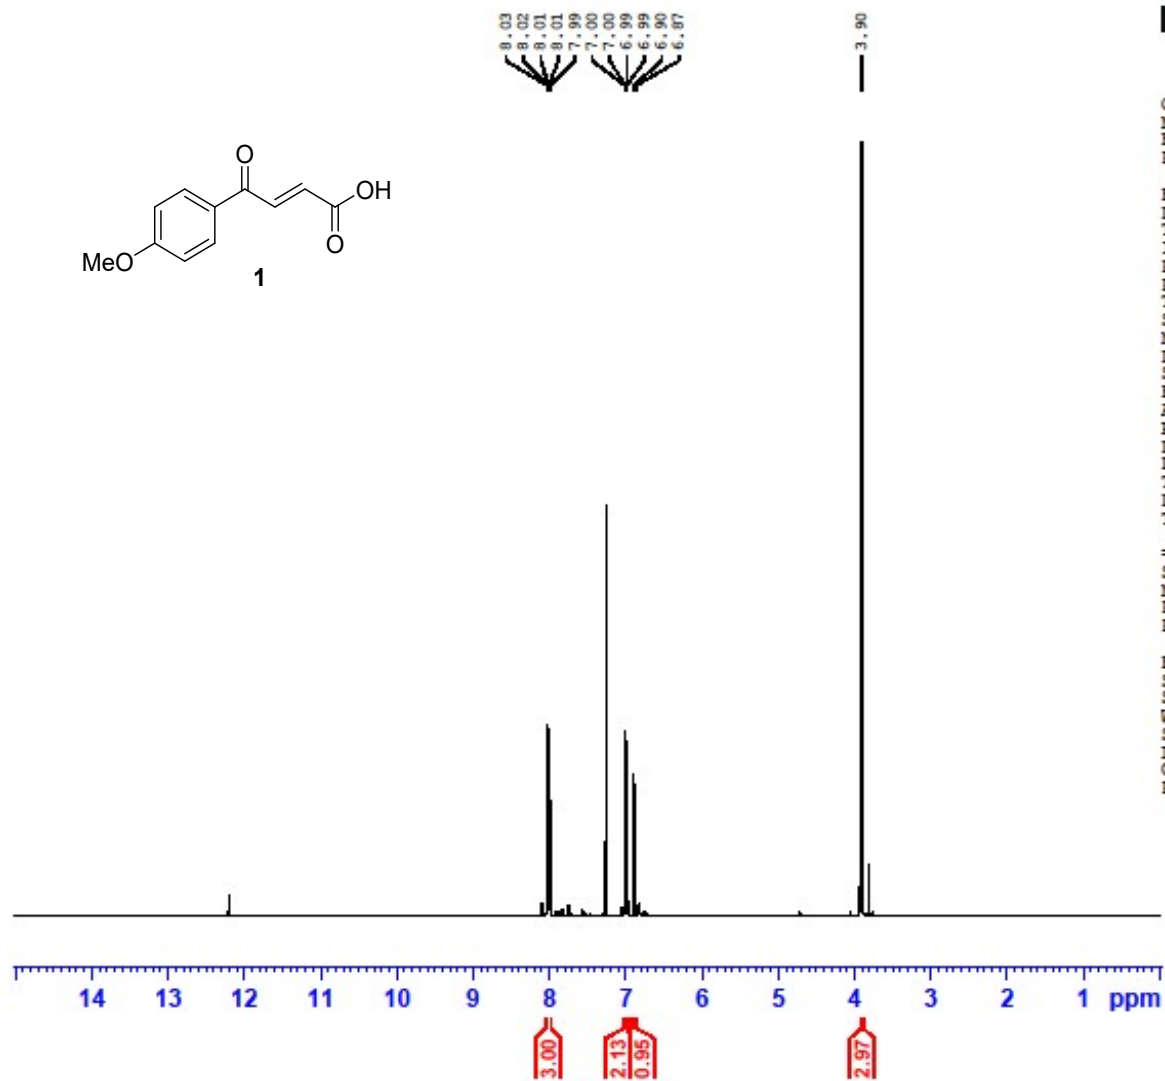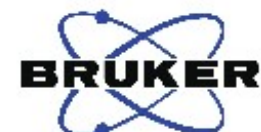

Current Data Parameters  
NAME MU-646-33-F1  
EXPNO 20  
PROCNO 1

F2 - Acquisition Parameters  
Date\_ 20190524  
Time\_ 9.25  
INSTRUM spect  
PROBHD 5 mm PABBO BB-  
PULPROG zg30  
TD 65536  
SOLVENT CDCl3  
NS 16  
DS 0  
SWH 10330.578 Hz  
FIDRES 0.157632 Hz  
AQ 3.1719425 sec  
RG 645  
DW 48.400 usec  
DE 12.02 usec  
TE 295.9 K  
D1 1.00000000 sec  
TDO 1

==== CHANNEL f1 =====  
SF01 500.3030896 MHz  
NUC1 1H  
P1 16.10 usec  
PLW1 19.50000000 W

F2 - Processing parameters  
SI 65536  
SF 500.3000000 MHz  
WDW EM  
SSB 0  
LB 0.30 Hz  
GB 0  
PC 1.00

Compound 1

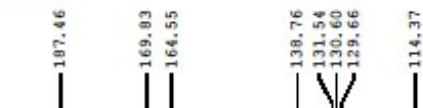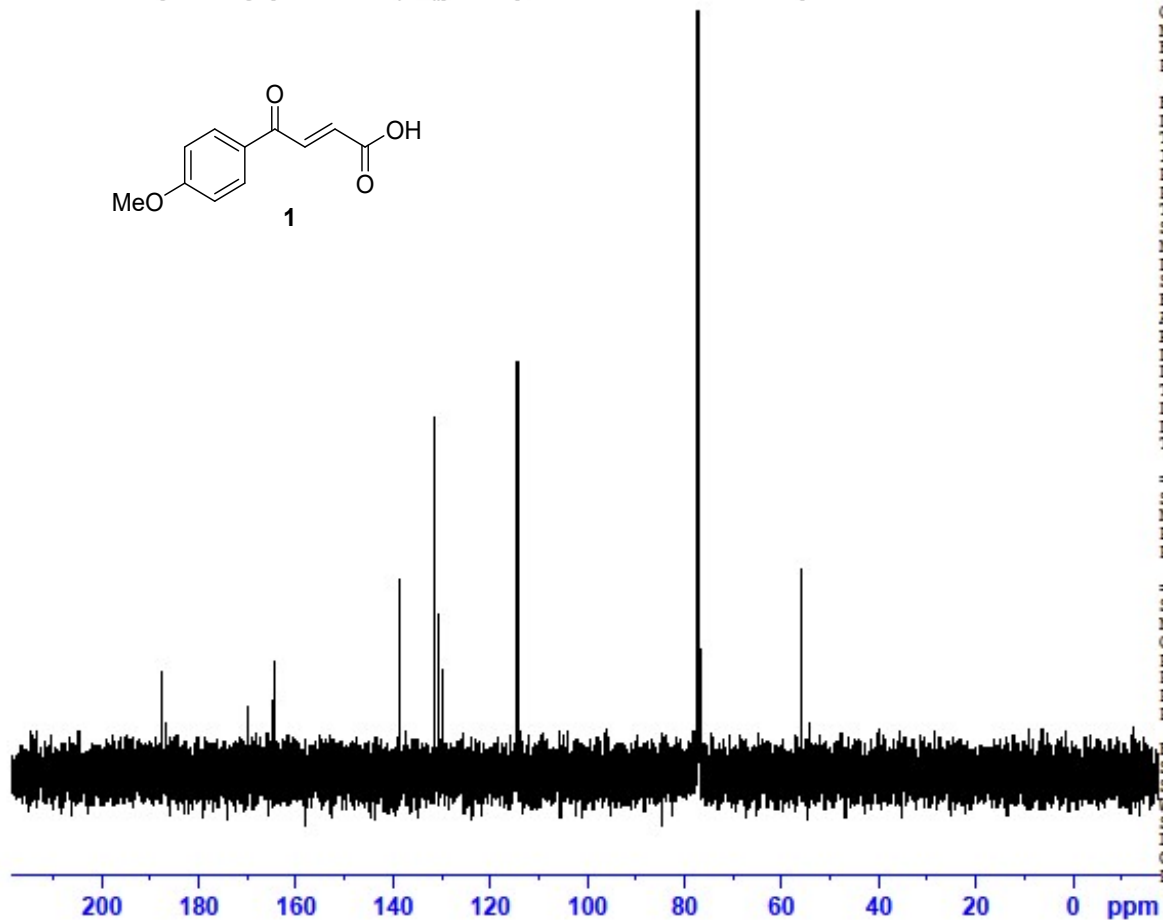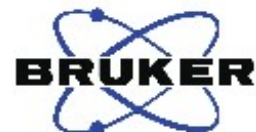

Current Data Parameters  
NAME MU-646-33-F1  
EXPNO 21  
PROCNO 1

F2 - Acquisition Parameters

Date\_ 20190524  
Time 10.31  
INSTRUM spect  
PROBHD 5 mm PABBO BB-  
PULPROG zgpg30  
TD 65536  
SOLVENT CDCl3  
NS 256  
DS 2  
SWH 29761.904 Hz  
FIDRES 0.454131 Hz  
AQ 1.1010048 sec  
RG 456  
DW 16.800 usec  
DE 7.65 usec  
TE 298.8 K  
D1 2.00000000 sec  
D11 0.03000000 sec  
TDO 1

==== CHANNEL f1 =====

SFO1 125.8131151 MHz  
NUC1 13C  
P1 9.90 usec  
PLW1 82.38999939 W

==== CHANNEL f2 =====

SFO2 500.3020012 MHz  
NUC2 1H  
CPDPRG[2] waltz16  
PCPD2 80.00 usec  
PLW2 19.50000000 W  
PLW12 0.78978002 W  
PLW13 0.39725000 W

F2 - Processing parameters

SI 65536  
SF 125.8005350 MHz  
WDW EM  
SSB 0  
LB 1.00 Hz  
GB 0  
PC 1.40



Compound 2

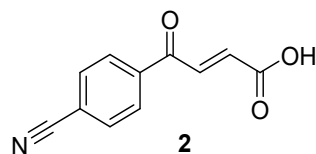

8.18  
8.16  
7.94  
7.93  
7.92  
7.90  
6.84  
6.81



Current Data Parameters  
NAME MU-666-123-F4  
EXPNO 20  
PROCNO 1

F2 - Acquisition Parameters

Date\_ 20200214  
Time 4.23  
INSTRUM spect  
PROBHD 5 mm PABBO BB-  
PULPROG zg30  
TD 65536  
SOLVENT MeOD  
NS 16  
DS 0  
SWH 10330.578 Hz  
FIDRES 0.157632 Hz  
AQ 3.1719425 sec  
RG 512  
DW 48.400 usec  
DE 12.02 usec  
TE 292.3 K  
D1 1.00000000 sec  
TDO 1

===== CHANNEL f1 =====  
SF01 500.3030896 MHz  
NUC1 1H  
P1 16.10 usec  
PLW1 19.50000000 W

F2 - Processing parameters

SF 65536  
SF 500.3000000 MHz  
WDW EM  
SSB 0  
LB 0.30 Hz  
GB 0  
PC 1.00

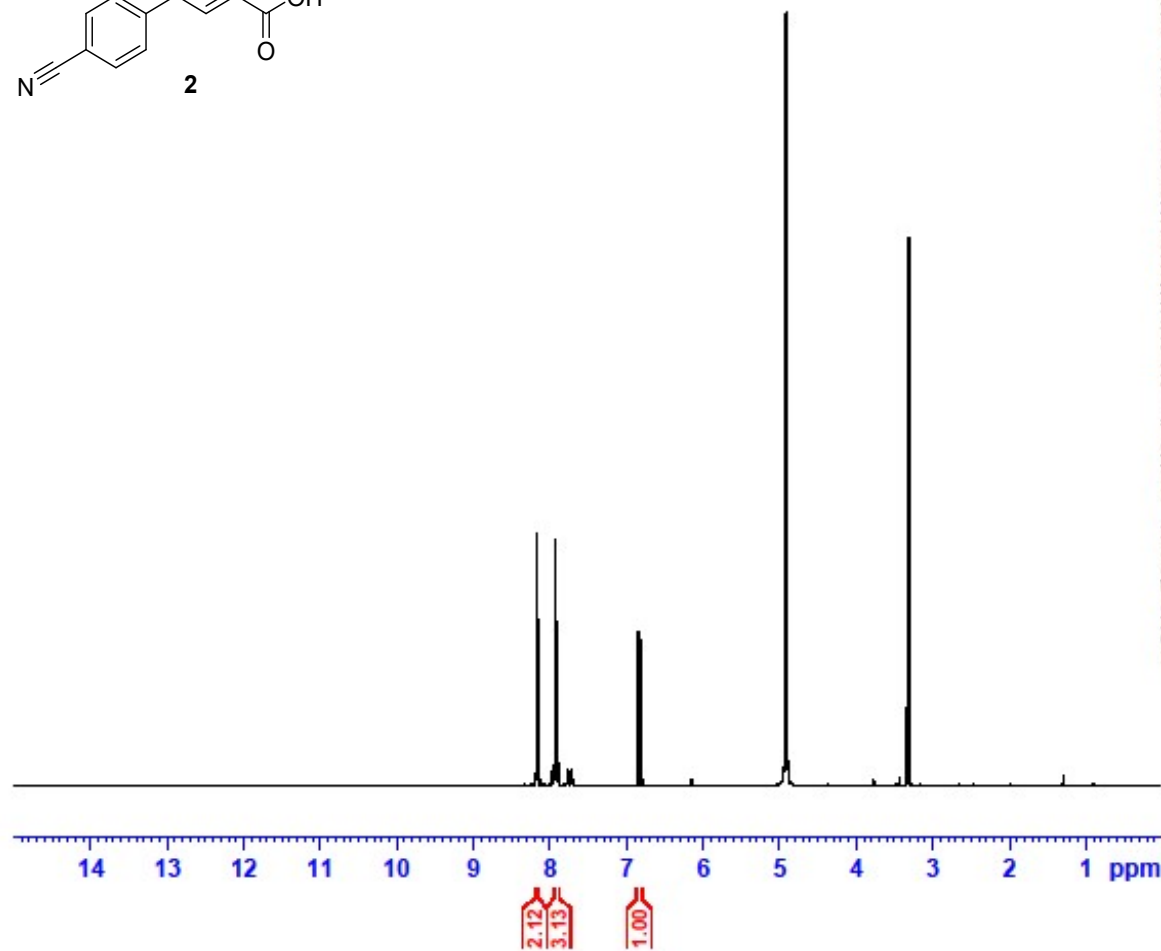

Compound 2

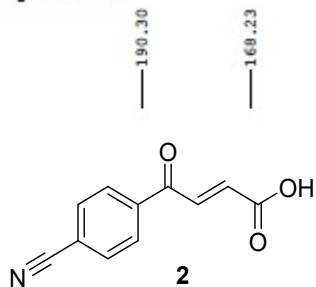

190.30

169.23

141.19

136.84

135.05

133.94

130.43

118.87

117.87

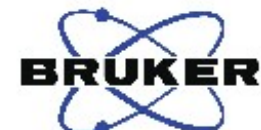

Current Data Parameters  
NAME MU-666-123-F4  
EXPNO 21  
PROCNO 1

F2 - Acquisition Parameters

Date\_ 20200214  
Time 4.41  
INSTRUM spect  
PROBHD 5 mm PABBO BB-  
PULPROG zgpg30  
TD 65536  
SOLVENT MeOD  
NS 256  
DS 2  
SWH 29761.904 Hz  
FIDRES 0.454131 Hz  
AQ 1.1010048 sec  
RG 456  
DW 16.800 usec  
DE 7.65 usec  
TE 295.2 K  
D1 2.00000000 sec  
D11 0.03000000 sec  
TDO 1

==== CHANNEL f1 =====

SFO1 125.8131151 MHz  
NUC1 13C  
P1 9.90 usec  
PLW1 82.38999939 W

==== CHANNEL f2 =====

SFO2 500.3020012 MHz  
NUC2 1H  
CPDPRG[2] waltz16  
PCPD2 80.00 usec  
PLW2 19.50000000 W  
PLW12 0.78978002 W  
PLW13 0.39725000 W

F2 - Processing parameters

SI 65536  
SF 125.8005350 MHz  
WDW EM  
SSB 0  
GB 0  
PC 1.40

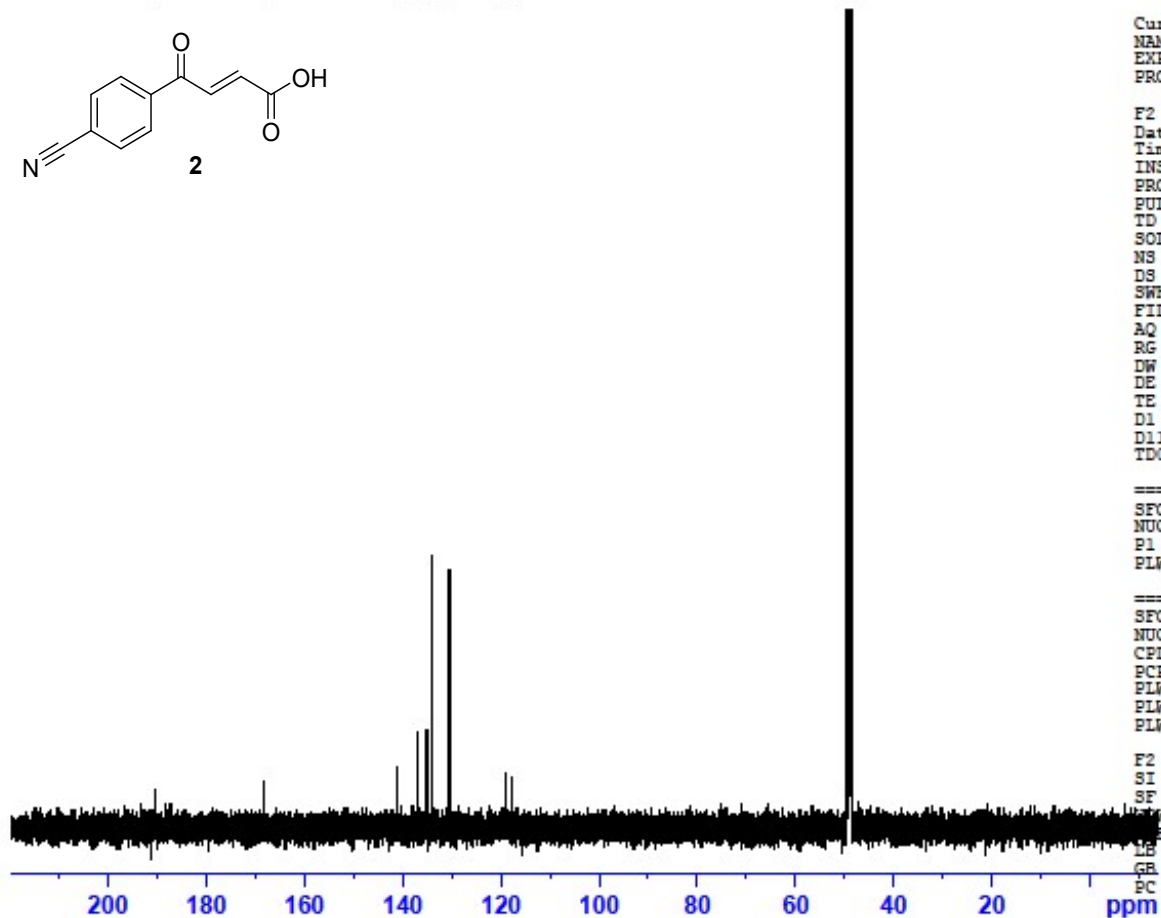

Compound 3

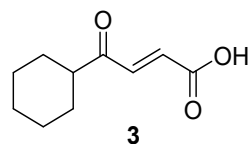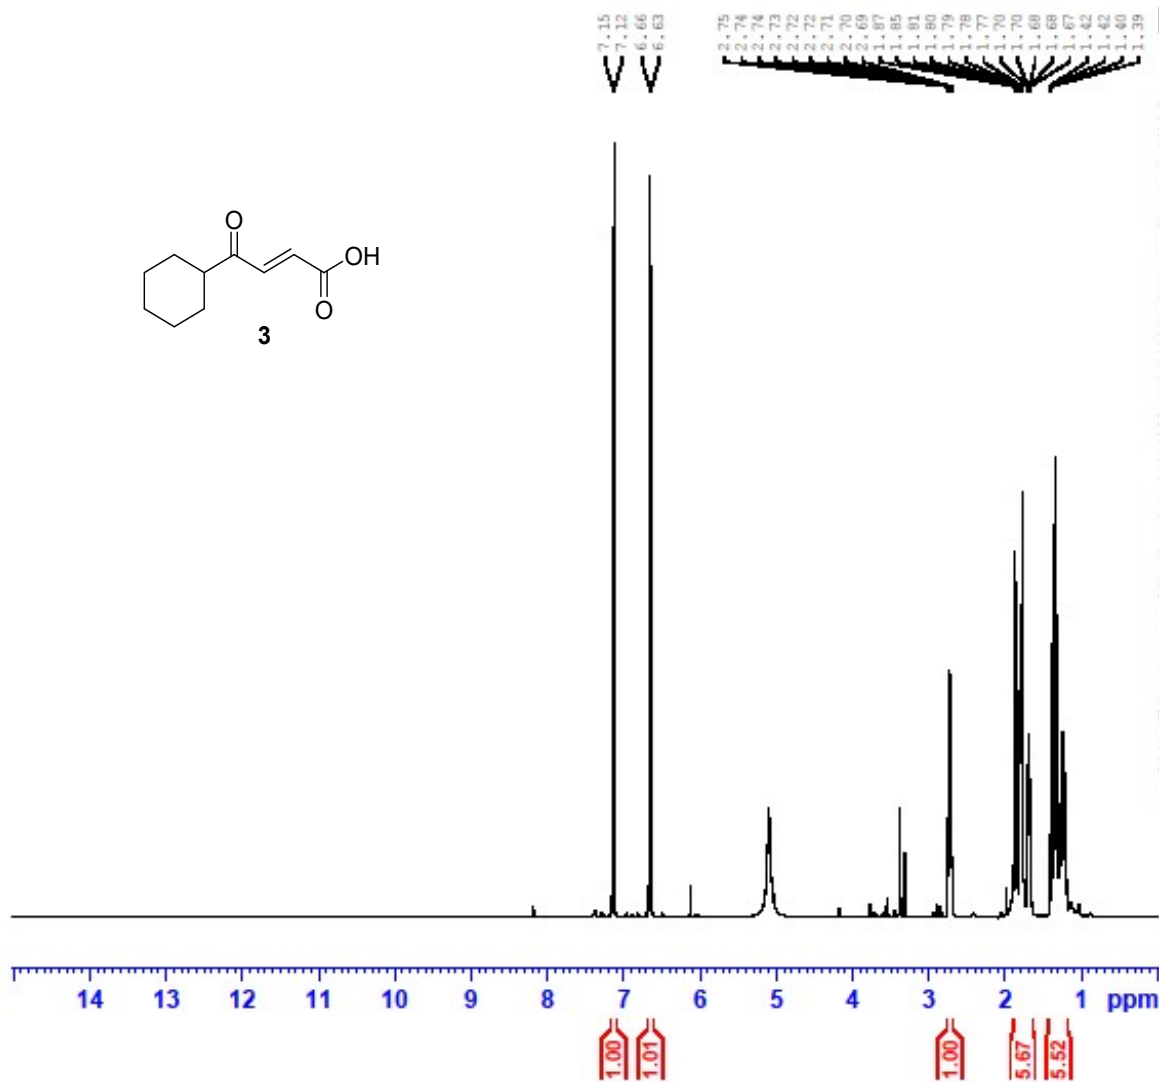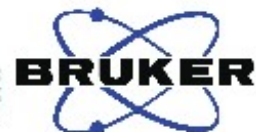

Current Data Parameters  
NAME MU-666-37-F2  
EXPNO 20  
PROCNO 1

F2 - Acquisition Parameters

Date\_ 20191127  
Time 19.06  
INSTRUM spect  
PROBHD 5 mm PABO BB-  
PULPROG zg30  
TD 65536  
SOLVENT MeOD  
NS 16  
DS 0  
SWH 10330.578 Hz  
FIDRES 0.157632 Hz  
AQ 3.1719425 sec  
RG 36  
DW 48.400 usec  
DE 12.02 usec  
TE 298.2 K  
D1 1.00000000 sec  
TDO 1

===== CHANNEL f1 =====  
SF01 500.3030896 MHz  
NUC1 1H  
P1 16.10 usec  
PLW1 19.50000000 W

F2 - Processing parameters

SF 500.3000000 MHz  
WDW EM  
SSB 0  
LB 0.30 Hz  
GB 0  
PC 1.00

Compound 3

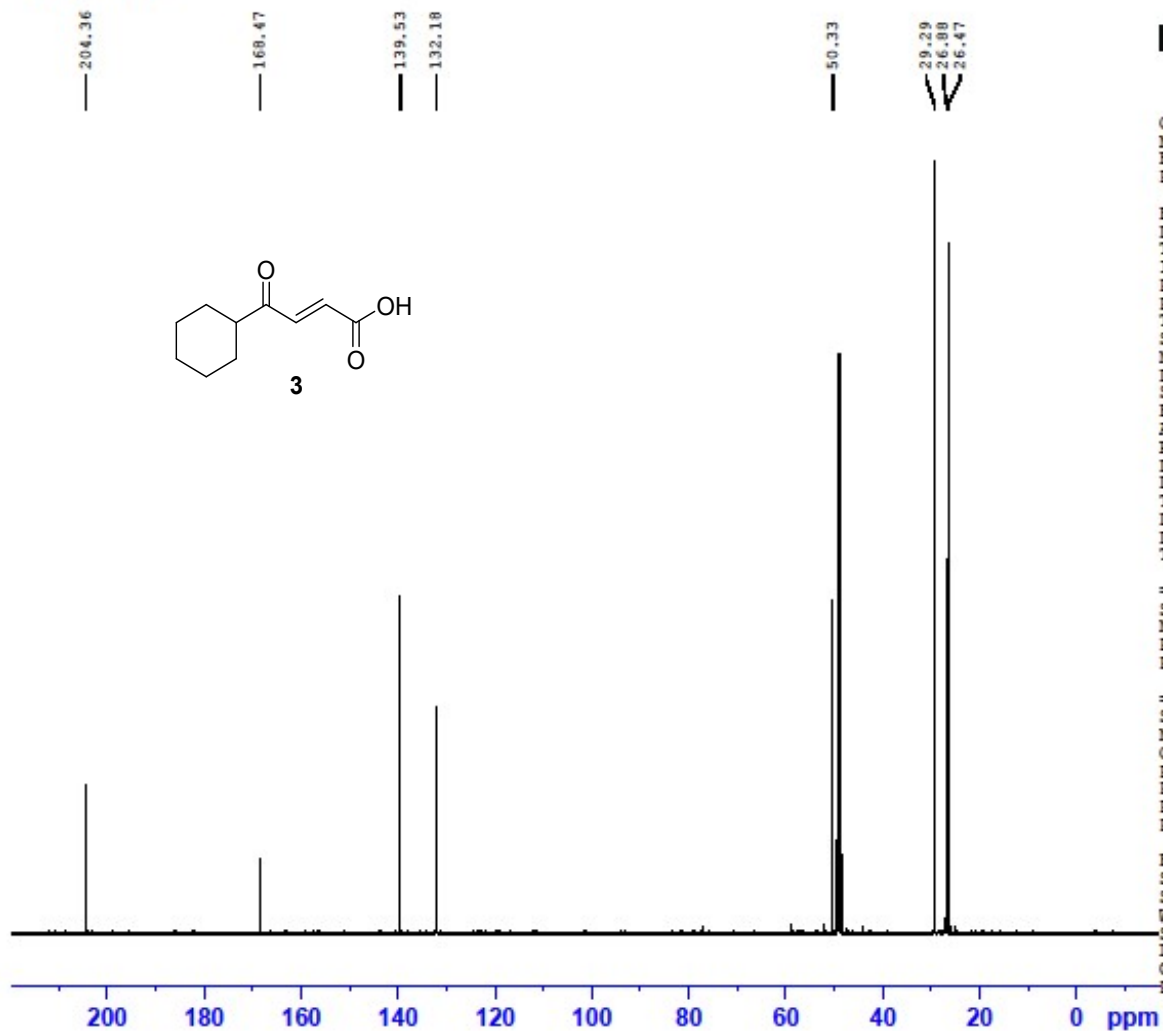

Current Data Parameters  
NAME MU-666-37-F2  
EXPNO 21  
PROCNO 1

F2 - Acquisition Parameters

Date\_ 20191127  
Time 15.24  
INSTRUM spect  
PROBHD 5 mm PABBO BB-  
PULPROG zgpg30  
TD 65536  
SOLVENT MeOD  
NS 256  
DS 2  
SWH 29761.904 Hz  
FIDRES 0.454131 Hz  
AQ 1.1010048 sec  
RG 456  
DW 16.800 usec  
DE 7.65 usec  
TE 298.2 K  
D1 2.00000000 sec  
D11 0.03000000 sec  
TDO 1

===== CHANNEL f1 =====

SFO1 125.8131151 MHz  
NUC1 13C  
P1 9.90 usec  
PLW1 82.38999939 W

===== CHANNEL f2 =====

SFO2 500.3020012 MHz  
NUC2 1H  
CPDPRG[2] waltz16  
PCPD2 80.00 usec  
PLW2 19.50000000 W  
PLW12 0.78978002 W  
PLW13 0.39725000 W

F2 - Processing parameters

SI 65536  
SF 125.8005350 MHz  
WDW EM  
SSB 0  
LB 1.00 Hz  
GB 0  
PC 1.40

zqj-Aldol-5

13.14

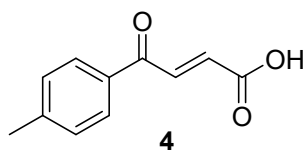

7.94  
7.93  
7.89  
7.86  
7.39  
7.37  
6.69  
6.66

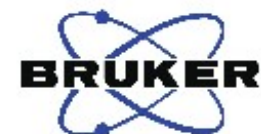

Current Data Parameters  
NAME zqj-Aldol-5  
EXPNO 1  
PROCNO 1

F2 - Acquisition Parameters  
Date\_ 20210402  
Time 6.20  
INSTRUM spect  
PROBHD 5 mm PABBO BB-  
PULPROG zg30  
TD 65536  
SOLVENT DMSO  
NS 16  
DS 0  
SWH 12019.230 Hz  
FIDRES 0.183399 Hz  
AQ 2.7262976 sec  
RG 128  
DW 41.600 usec  
DE 6.50 usec  
TE 300.1 K  
D1 1.00000000 sec  
TDO 1

==== CHANNEL f1 =====  
SF01 600.1329337 MHz  
NUC1 1H  
P1 13.70 usec  
PLW1 19.34000015 W

F2 - Processing parameters  
SI 65536  
SF 600.1299929 MHz  
WDW EM  
SSB 0  
LB 0 Hz  
GB 0  
PC 1.00

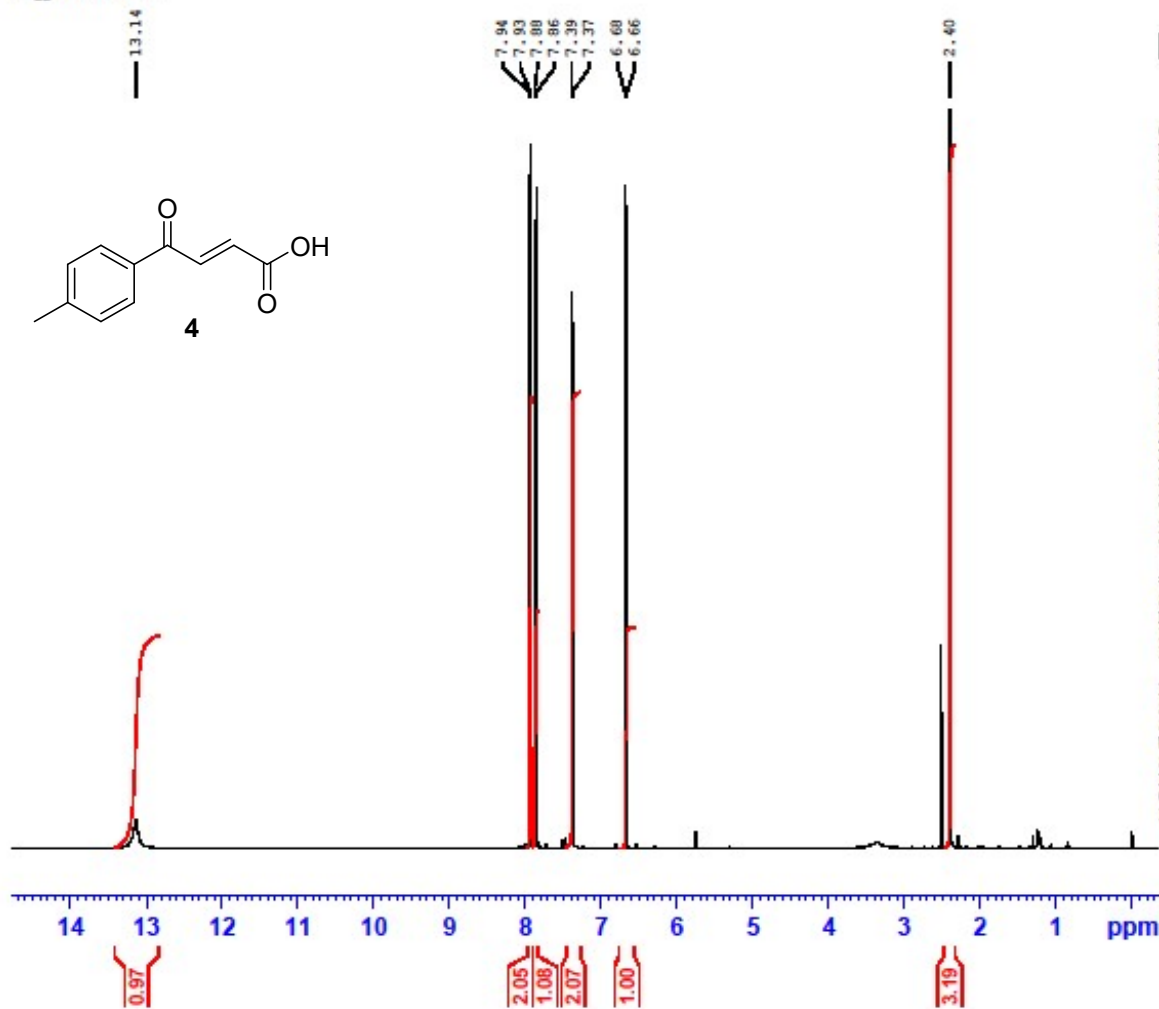

zqj-Aldol-5

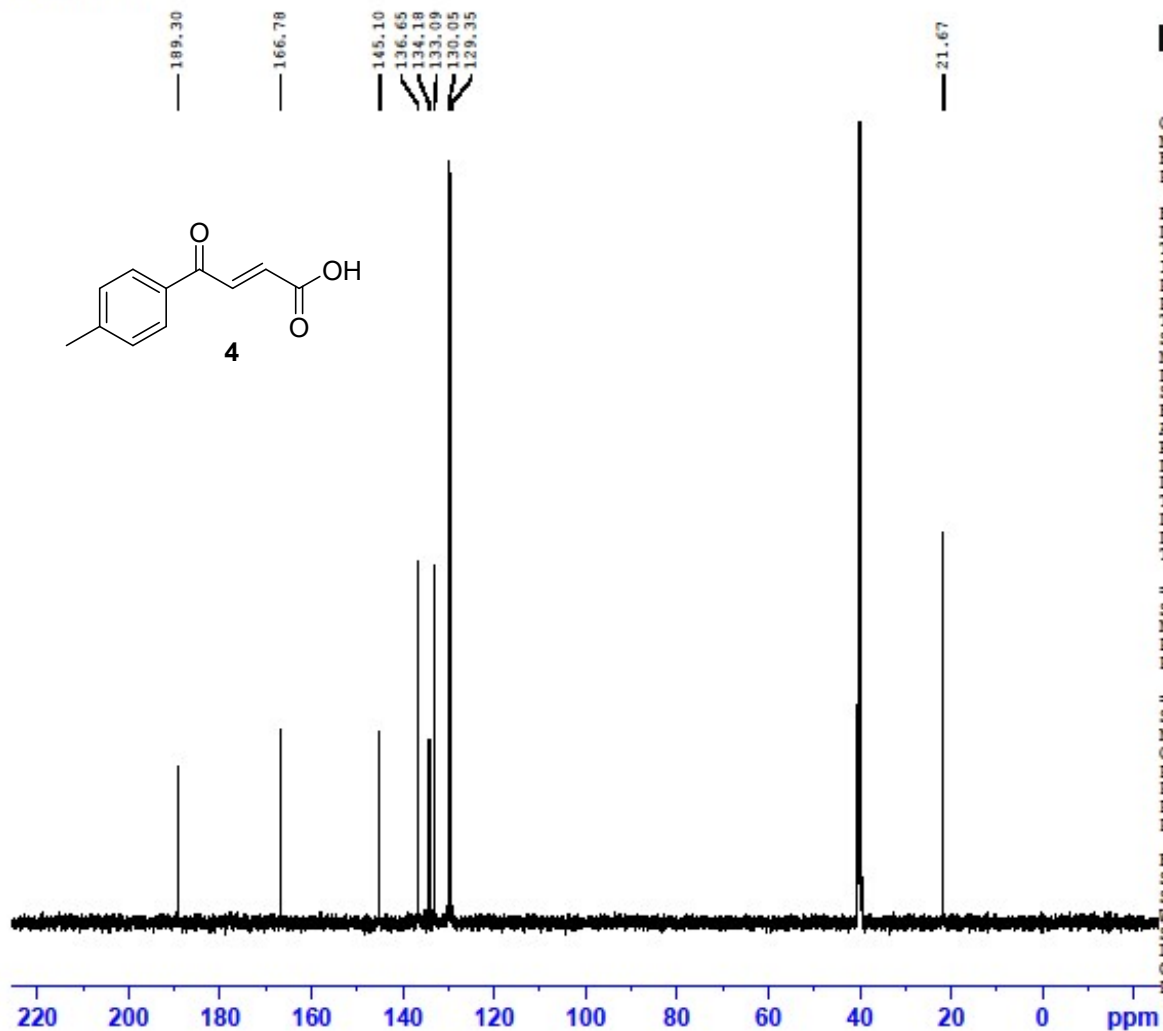

Current Data Parameters  
NAME zqj-Aldol-5  
EXPNO 2  
PROCNO 1

F2 - Acquisition Parameters  
Date\_ 20210402  
Time 6.25  
INSTRUM spect  
PROBHD 5 mm PABBO BB-  
PULPROG zgpg30  
TD 37874  
SOLVENT DMSO  
NS 141  
DS 4  
SWH 37878.789 Hz  
FIDRES 1.000126 Hz  
AQ 0.4999368 sec  
RG 2050  
DW 13.200 usec  
DE 6.50 usec  
TE 301.7 K  
D1 1.00000000 sec  
D11 0.03000000 sec  
TDO 1

===== CHANNEL f1 =====  
SFO1 150.9178990 MHz  
NUC1 13C  
P1 9.00 usec  
PLW1 41.50000000 W

===== CHANNEL f2 =====  
SFO2 600.1324005 MHz  
NUC2 1H  
CPDPRG[2] waltz16  
PCPD2 70.00 usec  
PLW2 19.34000015 W  
PLW12 1.01040006 W  
PLW13 0.49509999 W

F2 - Processing parameters  
SI 65536  
SF 150.9028112 MHz  
WDW EM  
SSB 0  
LB 3.00 Hz  
GB 0  
PC 1.40

zqj-Aldol-7

13.15

7.97  
7.95  
7.89  
7.86  
7.42  
7.40  
6.69  
6.67

2.72  
2.70  
2.69  
2.68

1.22  
1.21  
1.19

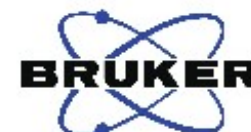

Current Data Parameters  
NAME zqj-Aldol-7  
EXPNO 1  
PROCNO 1

F2 - Acquisition Parameters

Date\_ 20210407  
Time 5.40  
INSTRUM spect  
PROBHD 5 mm PABBO BB-  
PULPROG zg30  
TD 65536  
SOLVENT DMSO  
NS 16  
DS 0  
SWH 12019.230 Hz  
FIDRES 0.163399 Hz  
AQ 2.7262976 sec  
RG 128  
DW 41.600 usec  
DE 6.50 usec  
TE 300.2 K  
D1 1.00000000 sec  
TDO 1

==== CHANNEL f1 =====  
SF01 600.1329337 MHz  
NUC1 1H  
P1 13.70 usec  
PLW1 19.34000015 W

F2 - Processing parameters  
SI 65536  
SF 600.1299929 MHz  
WDW EM  
SSB 0  
LB 0 Hz  
GB 0  
PC 1.00

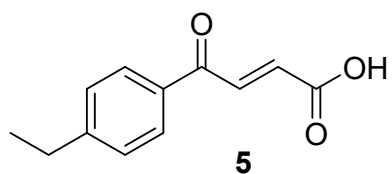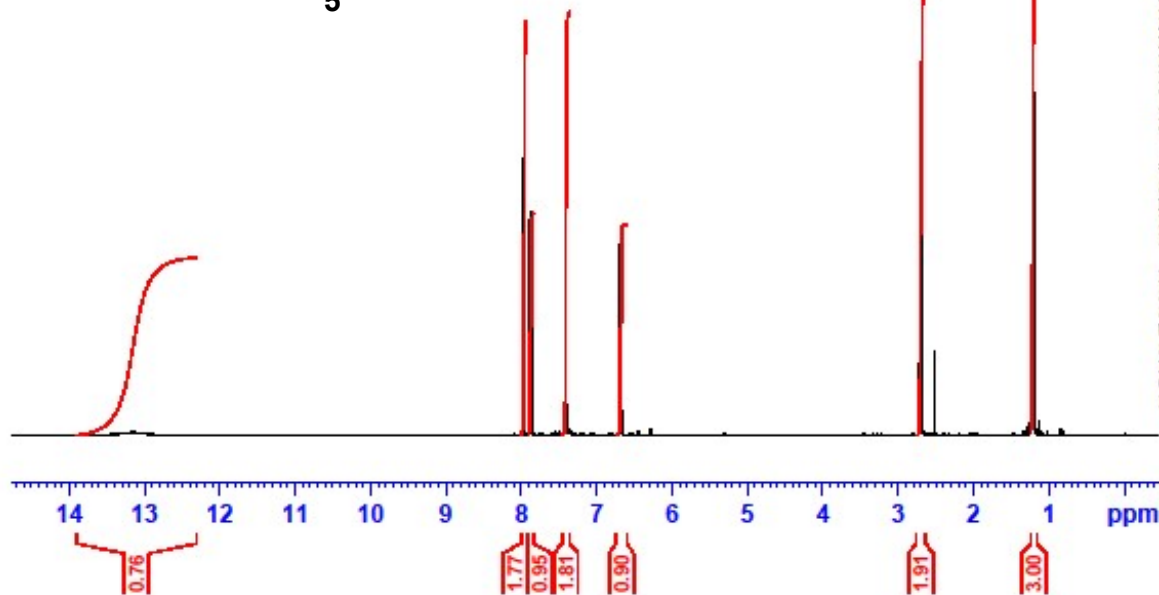

zqj-Aldol-7

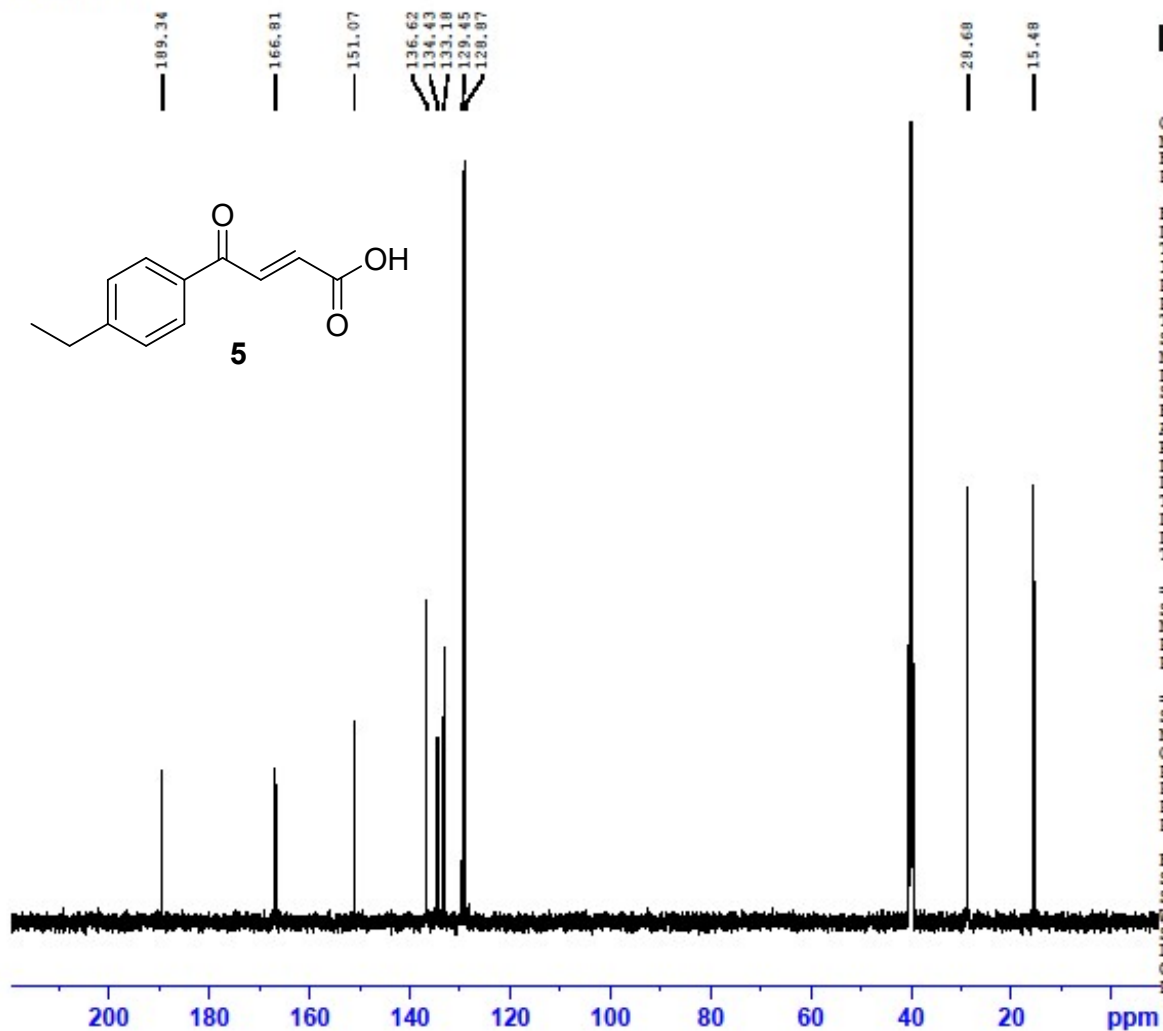

Current Data Parameters  
NAME zqj-Aldol-7  
EXPNO 2  
PROCNO 1

F2 - Acquisition Parameters  
Date\_ 20210407  
Time 5.45  
INSTRUM spect  
PROBHD 5 mm PABBO BB-  
PULPROG zgpg30  
TD 37874  
SOLVENT DMSO  
NS 90  
DS 4  
SWH 37878.789 Hz  
FIDRES 1.000126 Hz  
AQ 0.4999368 sec  
RG 2050  
DW 13.200 usec  
DE 6.50 usec  
TE 301.4 K  
D1 1.00000000 sec  
D11 0.03000000 sec  
TDO 1

===== CHANNEL f1 =====  
SFO1 150.9178990 MHz  
NUC1 13C  
P1 9.00 usec  
PLW1 41.50000000 W

===== CHANNEL f2 =====  
SFO2 600.1324005 MHz  
NUC2 1H  
CPDPRG[2] walts16  
PCPD2 70.00 usec  
PLW2 19.34000015 W  
PLW12 1.01040006 W  
PLW13 0.49509999 W

F2 - Processing parameters  
SI 65536  
SF 150.9028112 MHz  
WDW EM  
SSB 0  
LB 3.00 Hz  
GB 0  
PC 1.40



zqj-Aldol-6

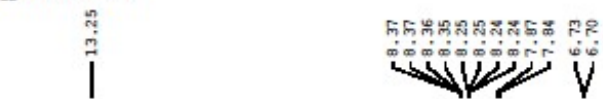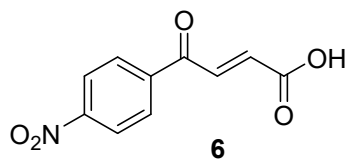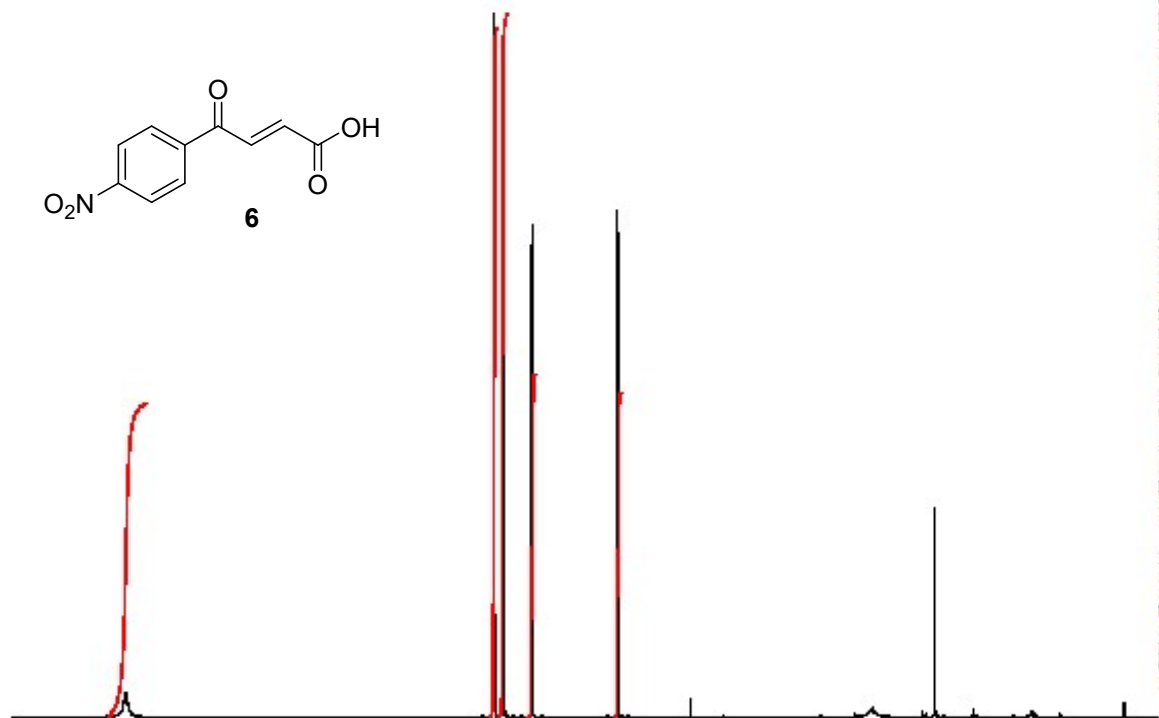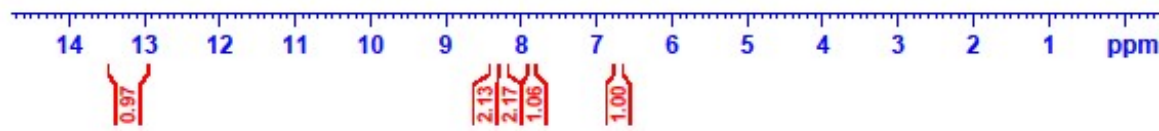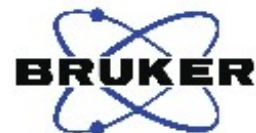

Current Data Parameters  
NAME zqj-Aldol-6  
EXPNO 1  
PROCNO 1

F2 - Acquisition Parameters  
Date\_ 20210402  
Time 6.30  
INSTRUM spect  
PROBHD 5 mm PABBO BB-  
PULPROG zg30  
TD 65536  
SOLVENT DMSO  
NS 16  
DS 0  
SWH 12019.230 Hz  
FIDRES 0.183399 Hz  
AQ 2.7262976 sec  
RG 228  
DW 41.600 usec  
DE 6.50 usec  
TE 300.3 K  
D1 1.00000000 sec  
TD0 1

==== CHANNEL f1 =====  
SF01 600.1329337 MHz  
NUC1 1H  
P1 13.70 usec  
PLW1 19.34000015 W

F2 - Processing parameters  
SI 65536  
SF 600.1299929 MHz  
WDW EM  
SSB 0  
LB 0 Hz  
GB 0  
PC 1.00

zqj-Aldol-6

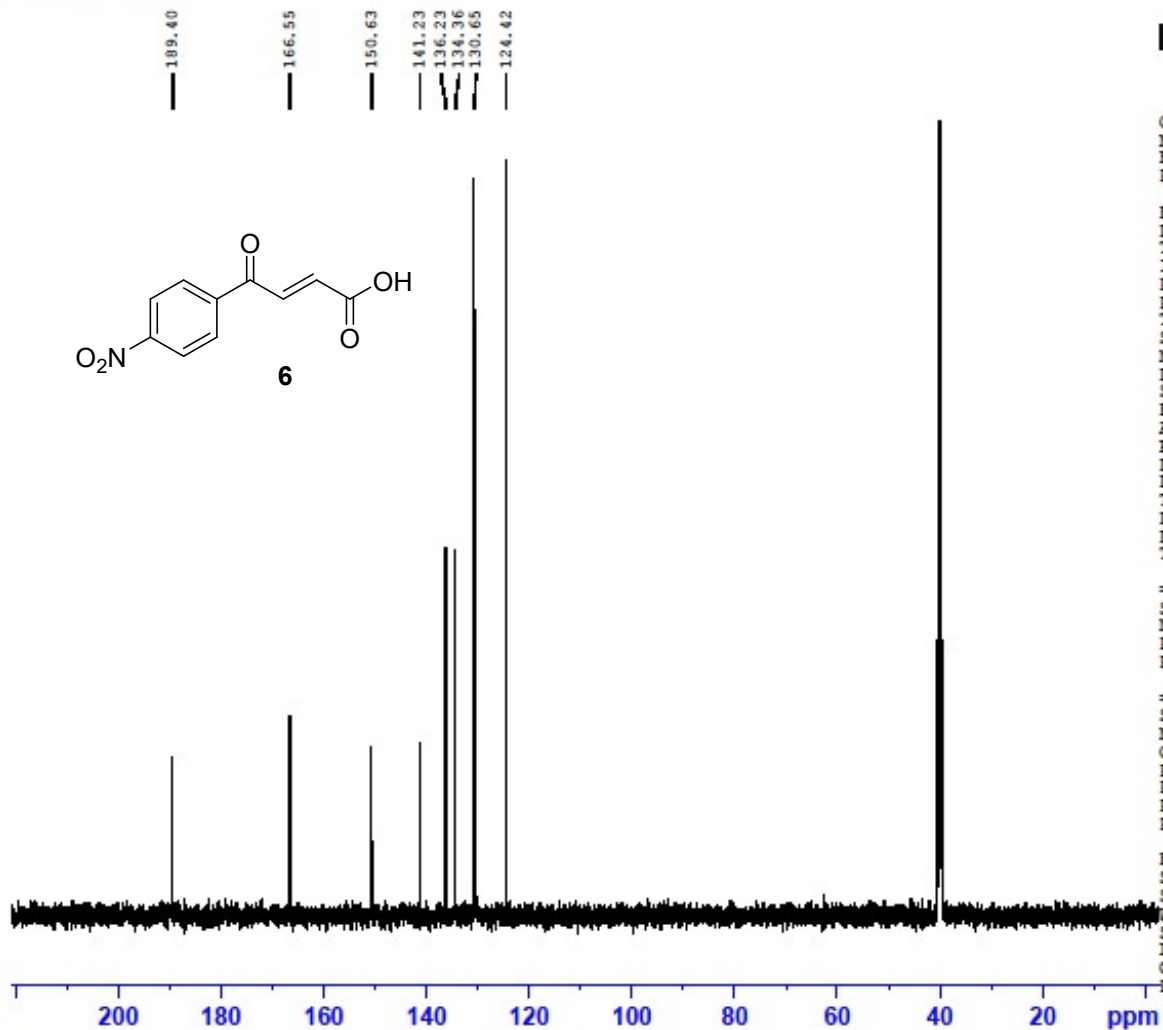

Current Data Parameters  
NAME zqj-Aldol-6  
EXPNO 2  
PROCNO 1

F2 - Acquisition Parameters

Date\_ 20210402  
Time\_ 6.36  
INSTRUM spect  
PROBHD 5 mm PABBO BB-  
PULPROG zgpg30  
TD 37874  
SOLVENT DMSO  
NS 107  
DS 4  
SWH 37878.789 Hz  
FIDRES 1.000126 Hz  
AQ 0.4999368 sec  
RG 2050  
DW 13.200 usec  
DE 6.50 usec  
TE 301.8 K  
D1 1.00000000 sec  
D11 0.03000000 sec  
TDO 1

==== CHANNEL f1 =====

SFO1 150.9178990 MHz  
NUC1 13C  
P1 9.00 usec  
PLW1 41.50000000 W

==== CHANNEL f2 =====

SFO2 600.1324005 MHz  
NUC2 1H  
CPDPRG[2] waltz16  
PCPD2 70.00 usec  
PLW2 19.34000015 W  
PLW12 1.01040006 W  
PLW13 0.49509999 W

F2 - Processing parameters

SI 65536  
SF 150.9028112 MHz  
WDW EM  
SSB 0  
LB 3.00 Hz  
GB 0  
PC 1.40

zqj-Aldol-8

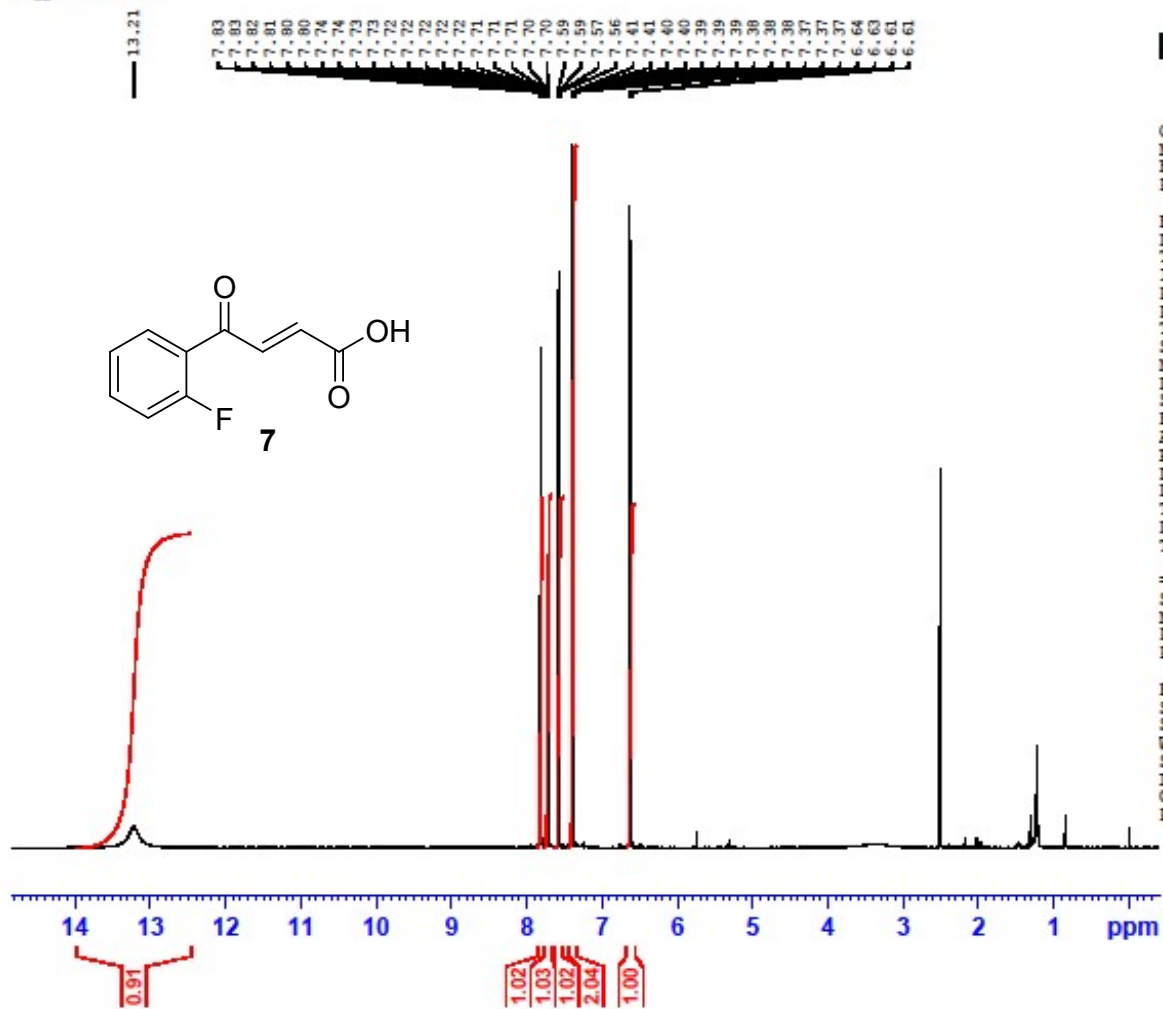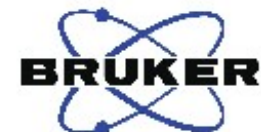

Current Data Parameters  
NAME zqj-Aldol-8  
EXPNO 1  
PROCNO 1

F2 - Acquisition Parameters  
Date\_ 20210407  
Time 4.40  
INSTRUM spect  
PROBHD 5 mm PABBO BB-  
PULPROG zg30  
TD 65536  
SOLVENT DMSO  
NS 16  
DS 0  
SWH 12019.230 Hz  
FIDRES 0.163399 Hz  
AQ 2.7262976 sec  
RG 128  
DW 41.600 usec  
DE 6.50 usec  
TE 299.3 K  
D1 1.00000000 sec  
TDO 1

==== CHANNEL f1 =====  
SF01 600.1329337 MHz  
NUC1 1H  
P1 13.70 usec  
PLW1 19.34000015 W

F2 - Processing parameters  
SI 65536  
SF 600.1299929 MHz  
WDW EM  
SSB 0  
LB 0 Hz  
GB 0  
PC 1.00

zqj-Aldol-8

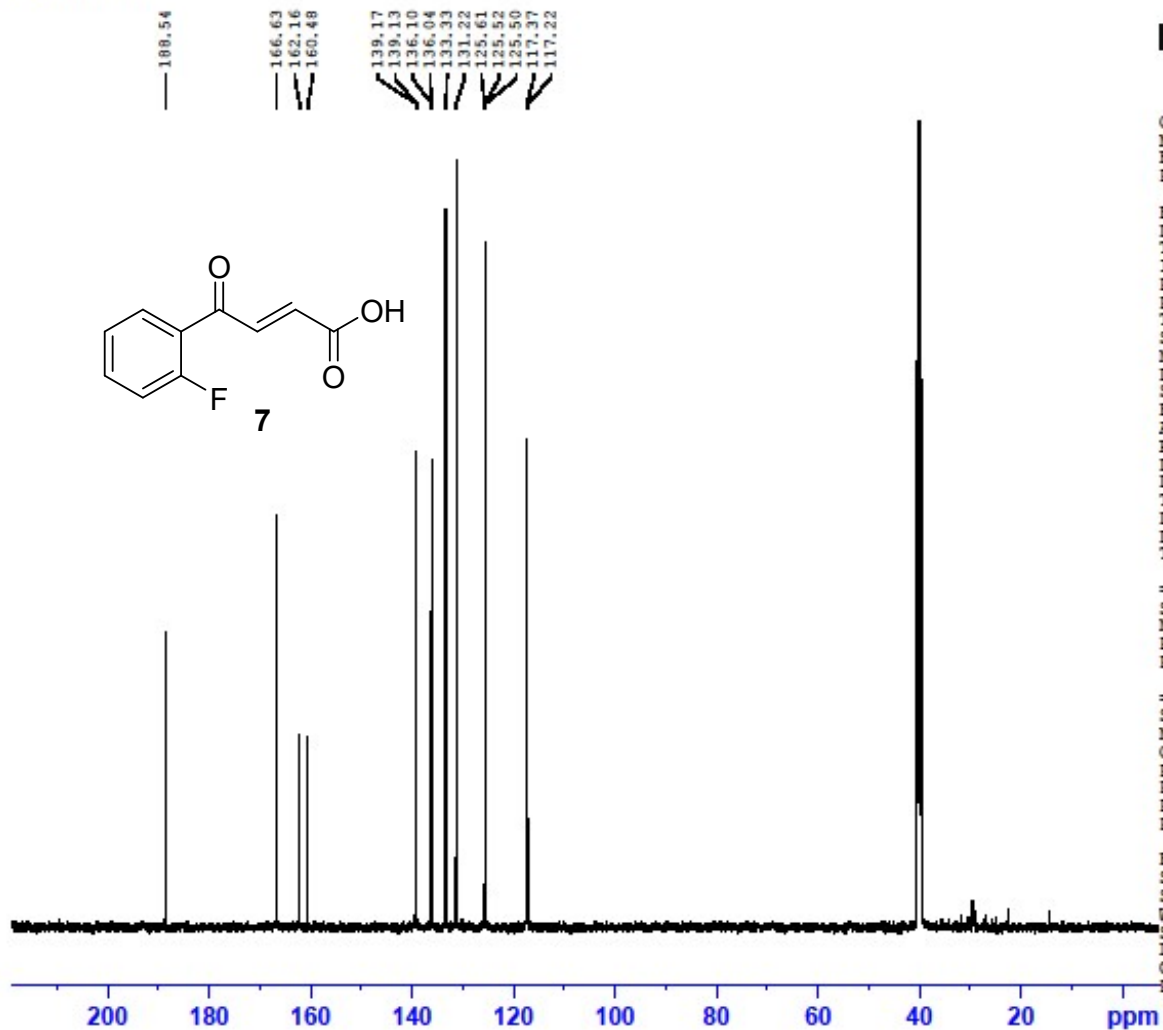

Current Data Parameters  
NAME zqj-Aldol-8  
EXPNO 2  
PROCNO 1

F2 - Acquisition Parameters  
Date\_ 20210407  
Time 5.35  
INSTRUM spect  
PROBHD 5 mm PABBO BB-  
PULPROG zgpg30  
TD 37874  
SOLVENT DMSO  
NS 2047  
DS 4  
SWH 37878.789 Hz  
FIDRES 1.000126 Hz  
AQ 0.4999368 sec  
RG 2050  
DW 13.200 usec  
DE 6.50 usec  
TE 302.1 K  
D1 1.00000000 sec  
D11 0.03000000 sec  
TDO 1

===== CHANNEL f1 =====  
SFO1 150.9178990 MHz  
NUC1 13C  
P1 9.00 usec  
PLW1 41.50000000 W

===== CHANNEL f2 =====  
SFO2 600.1324005 MHz  
NUC2 1H  
CPDPRG[2] waltz16  
PCPD2 70.00 usec  
PLW2 19.34000015 W  
PLW12 1.01040006 W  
PLW13 0.49509999 W

F2 - Processing parameters  
SI 65536  
SF 150.9028112 MHz  
WDW EM  
SSB 0  
LB 3.00 Hz  
GB 0  
PC 1.40

A-8-F

-111.29

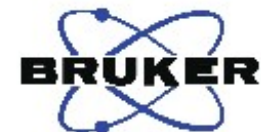

Current Data Parameters  
NAME A-8-F  
EXPNO 3  
PROCNO 1

F2 - Acquisition Parameters

Date\_ 20210506  
Time 16.45  
INSTRUM spect  
PROBHD 5 mm PABBO BB-  
PULPROG zgpg30  
TD 131072  
SOLVENT DMSO  
NS 32  
DS 4  
SWH 66964.289 Hz  
FIDRES 0.510897 Hz  
AQ 0.9786710 sec  
RG 128  
DW 7.467 usec  
DE 6.50 usec  
TE 300.0 K  
D1 1.00000000 sec  
TDO 1

===== CHANNEL f1 =====  
SF01 282.3761148 MHz  
NUC1 19F  
P1 19.50 usec  
PLW1 11.00000000 W

F2 - Processing parameters

SF 65536  
SF 282.4043550 MHz  
WDW EM  
SSB 0  
LB 3.00 Hz  
GB 0  
PC 1.00

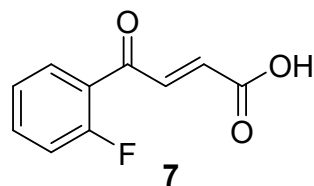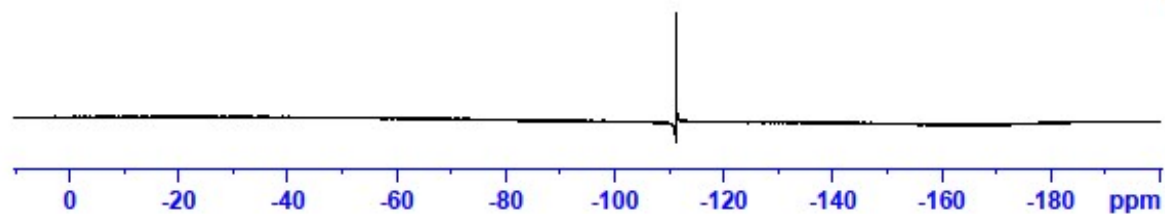

zqj-Aldol-9

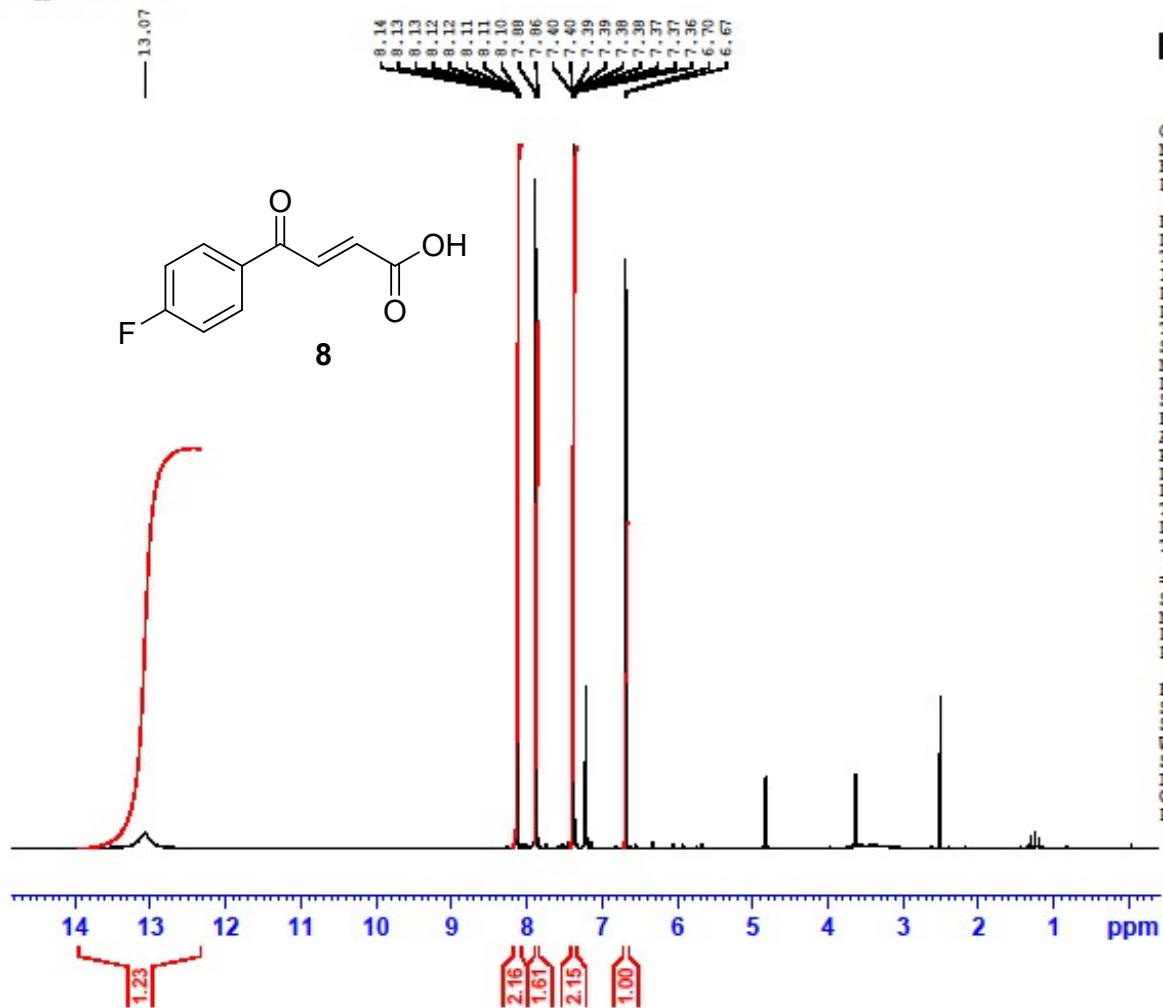

Current Data Parameters  
NAME zqj-Aldol-9  
EXPNO 1  
PROCNO 1

F2 - Acquisition Parameters  
Date\_ 20210407  
Time 5.50  
INSTRUM spect  
PROBHD 5 mm PABBO BB-  
PULPROG zg30  
TD 65536  
SOLVENT DMSO  
NS 16  
DS 0  
SWH 12019.230 Hz  
FIDRES 0.163399 Hz  
AQ 2.7262976 sec  
RG 128  
DW 41.600 usec  
DE 6.50 usec  
TE 300.0 K  
D1 1.00000000 sec  
TDO 1

==== CHANNEL f1 =====  
SF01 600.1329337 MHz  
NUC1 1H  
P1 13.70 usec  
PLW1 19.34000015 W

F2 - Processing parameters  
SI 65536  
SF 600.1299929 MHz  
WDW EM  
SSB 0  
LB 0 Hz  
GB 0  
PC 1.00

zqj-Aldol-9

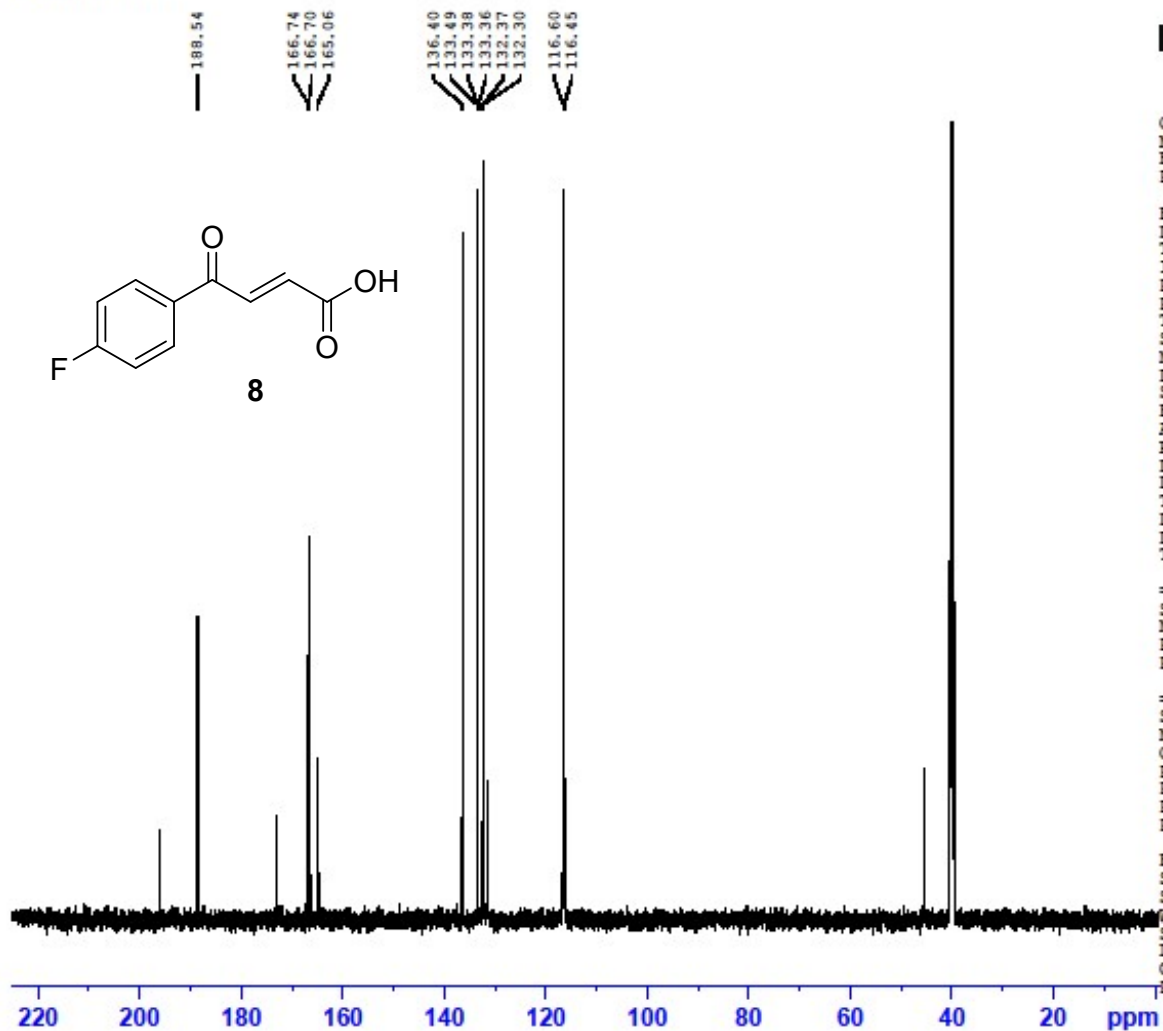

Current Data Parameters  
NAME zqj-Aldol-9  
EXPNO 2  
PROCNO 1

F2 - Acquisition Parameters  
Date\_ 20210407  
Time 5.55  
INSTRUM spect  
PROBHD 5 mm PABBO BB-  
PULPROG zgpg30  
TD 37874  
SOLVENT DMSO  
NS 174  
DS 4  
SWH 37878.789 Hz  
FIDRES 1.000126 Hz  
AQ 0.4999368 sec  
RG 2050  
DW 13.200 usec  
DE 6.50 usec  
TE 301.4 K  
D1 1.00000000 sec  
D11 0.03000000 sec  
TDO 1

===== CHANNEL f1 =====  
SFO1 150.9178990 MHz  
NUC1 13C  
P1 9.00 usec  
PLW1 41.50000000 W

===== CHANNEL f2 =====  
SFO2 600.1324005 MHz  
NUC2 1H  
CPDPRG[2] walts16  
PCPD2 70.00 usec  
PLW2 19.34000015 W  
PLW12 1.01040006 W  
PLW13 0.49509999 W

F2 - Processing parameters  
SI 65536  
SF 150.9028112 MHz  
WDW EM  
SSB 0  
LB 3.00 Hz  
GB 0  
PC 1.40

A-9-F

-104.52

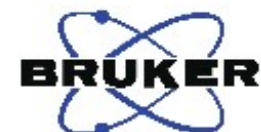

Current Data Parameters  
NAME A-9-F  
EXPNO 3  
PROCNO 1

F2 - Acquisition Parameters  
Date\_ 20210506  
Time 16.57  
INSTRUM spect  
PROBHD 5 mm PABBO BB-  
PULPROG zgpg30  
TD 131072  
SOLVENT DMSO  
NS 32  
DS 4  
SWH 66964.289 Hz  
FIDRES 0.510897 Hz  
AQ 0.9786710 sec  
RG 128  
DW 7.467 usec  
DE 6.50 usec  
TE 300.0 K  
D1 1.00000000 sec  
TDO 1

===== CHANNEL f1 =====  
SF01 282.3761148 MHz  
NUC1 19F  
P1 19.50 usec  
PLW1 11.00000000 W

F2 - Processing parameters  
SI 65536  
SF 282.4043550 MHz  
WDW EM  
SSB 0  
LB 3.00 Hz  
GB 0  
PC 1.00

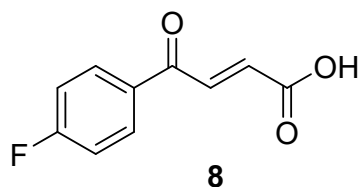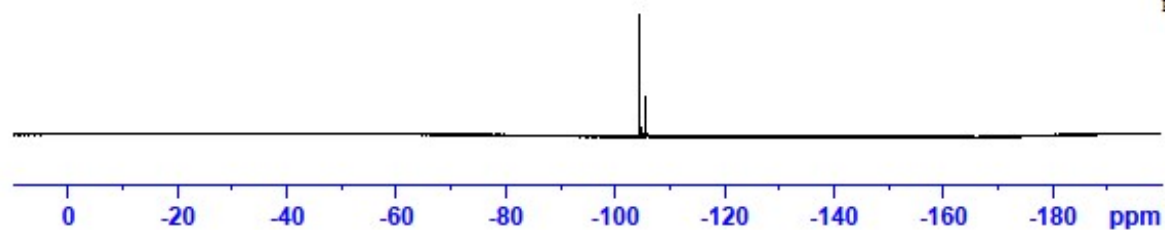



zqj-Aldol-10

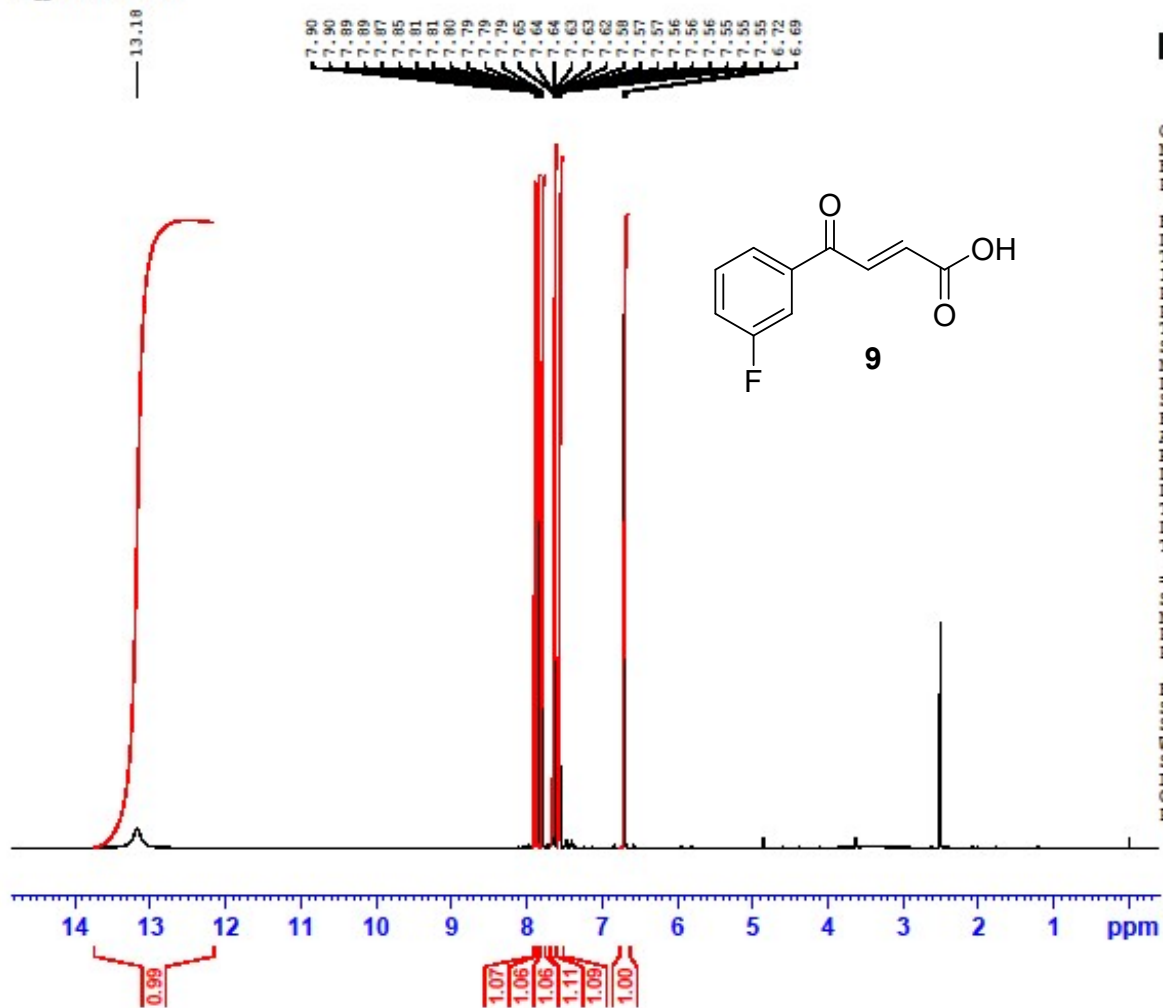

Current Data Parameters  
NAME zqj-Aldol-10  
EXPNO 1  
PROCNO 1

F2 - Acquisition Parameters  
Date\_ 20210408  
Time 3.38  
INSTRUM spect  
PROBHD 5 mm PABBO BB-  
PULPROG zg30  
TD 65536  
SOLVENT DMSO  
NS 16  
DS 0  
SWH 12019.230 Hz  
FIDRES 0.183399 Hz  
AQ 2.7262976 sec  
RG 128  
DW 41.600 usec  
DE 6.50 usec  
TE 300.3 K  
D1 1.00000000 sec  
TDO 1

==== CHANNEL f1 =====  
SF01 600.1329337 MHz  
NUC1 1H  
P1 13.70 usec  
PLW1 19.34000015 W

F2 - Processing parameters  
SI 65536  
SF 600.1299929 MHz  
WDW EM  
SSB 0  
LB 0 Hz  
GB 0  
PC 1.00

zqj-Aldol-10

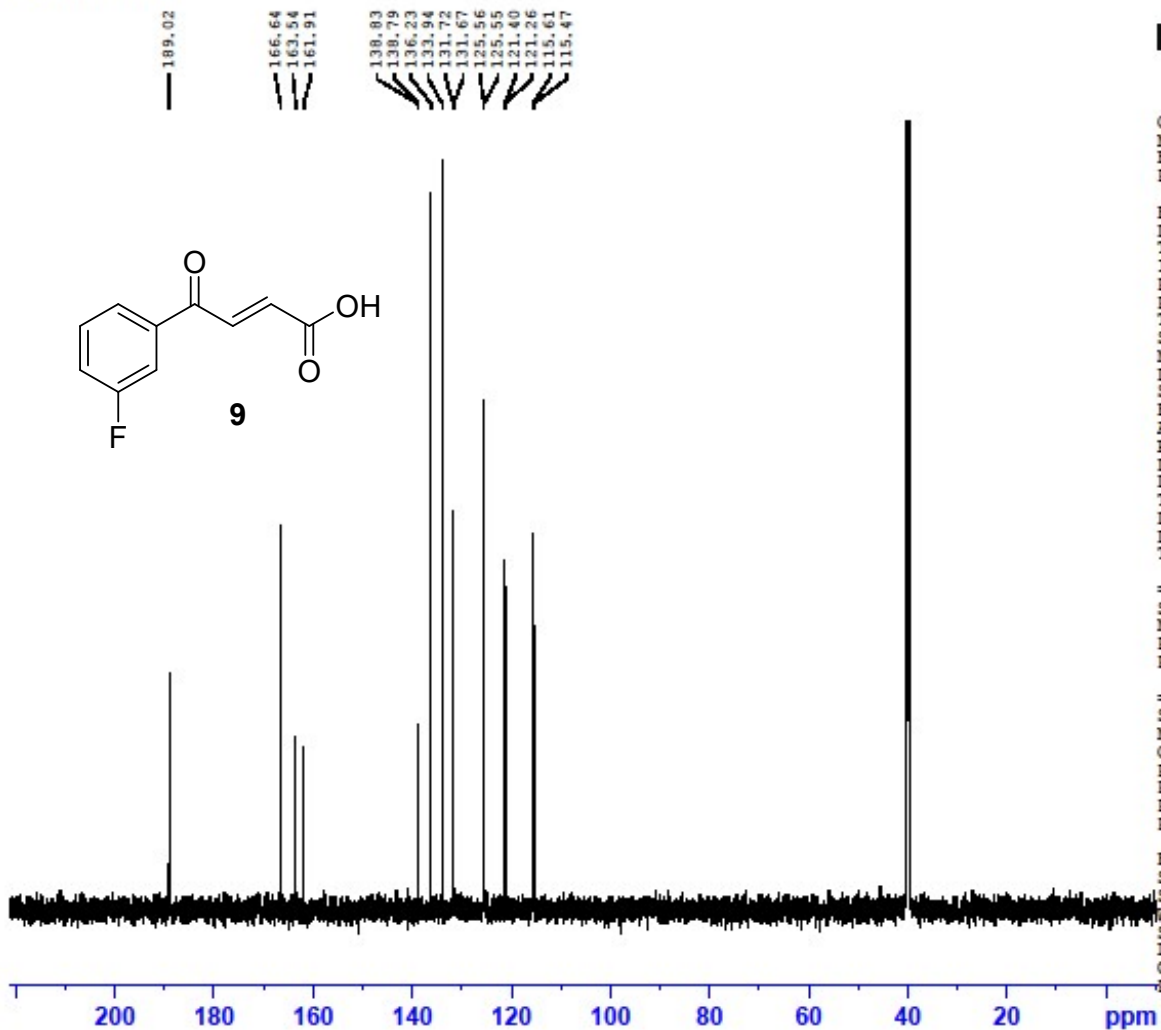

Current Data Parameters  
NAME zqj-Aldol-10  
EXPNO 2  
PROCNO 1

F2 - Acquisition Parameters  
Date\_ 20210408  
Time 3.43  
INSTRUM spect  
PROBHD 5 mm PABBO BB-  
PULPROG zgpg30  
TD 37874  
SOLVENT DMSO  
NS 212  
DS 4  
SWH 37878.789 Hz  
FIDRES 1.000126 Hz  
AQ 0.4999368 sec  
RG 2050  
DW 13.200 usec  
DE 6.50 usec  
TE 301.9 K  
D1 1.00000000 sec  
D11 0.03000000 sec  
TDO 1

===== CHANNEL f1 =====  
SFO1 150.9178990 MHz  
NUC1 13C  
P1 9.00 usec  
PLW1 41.50000000 W

===== CHANNEL f2 =====  
SFO2 600.1324005 MHz  
NUC2 1H  
CPDPRG[2] waltz16  
PCPD2 70.00 usec  
PLW2 19.34000015 W  
PLW12 1.01040006 W  
PLW13 0.49509999 W

F2 - Processing parameters  
SI 65536  
SF 150.9028112 MHz  
WDW EM  
SSB 0  
LB 3.00 Hz  
GB 0  
PC 1.40

A-10-F

-111.78

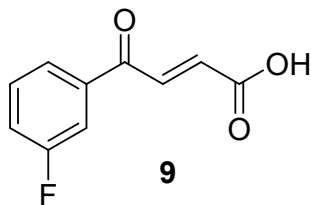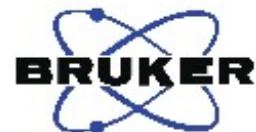

Current Data Parameters  
NAME A-10-F  
EXPNO 3  
PROCNO 1

F2 - Acquisition Parameters  
Date\_ 20210506  
Time 16.51  
INSTRUM spect  
PROBHD 5 mm PABBO BB-  
PULPROG zgpg30  
TD 131072  
SOLVENT DMSO  
NS 32  
DS 4  
SWH 66964.289 Hz  
FIDRES 0.510897 Hz  
AQ 0.9786710 sec  
RG 128  
DW 7.467 usec  
DE 6.50 usec  
TE 300.0 K  
D1 1.00000000 sec  
TDO 1

==== CHANNEL f1 =====  
SF01 282.3761148 MHz  
NUC1 19F  
P1 19.50 usec  
PLW1 11.00000000 W

F2 - Processing parameters  
SI 65536  
SF 282.4043550 MHz  
WDW EM  
SSB 0  
LB 3.00 Hz  
GB 0  
PC 1.00

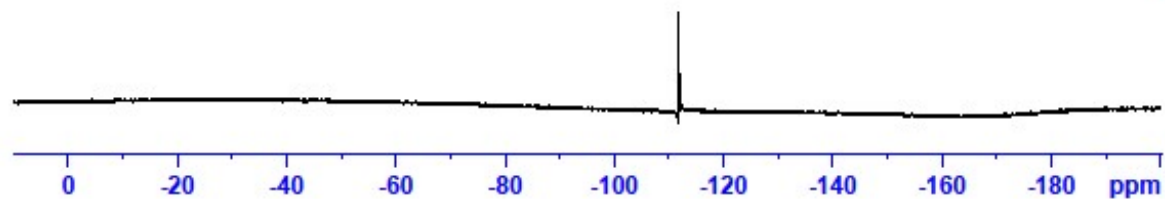

zqj-Aldol-11

13.09

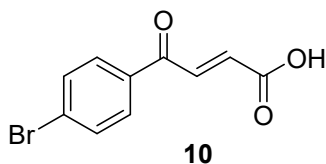

7.98  
7.98  
7.97  
7.97  
7.96  
7.96  
7.84  
7.81  
7.80  
7.80  
7.79  
7.79  
6.71  
6.68

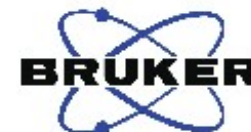

Current Data Parameters  
NAME zqj-Aldol-11  
EXPNO 11  
PROCNO 1

F2 - Acquisition Parameters

Date\_ 20210413  
Time 2.14  
INSTRUM spect  
PROBHD 5 mm PABBO BB-  
PULPROG zg30  
TD 65536  
SOLVENT DMSO  
NS 1  
DS 0  
SWH 12019.230 Hz  
FIDRES 0.183399 Hz  
AQ 2.7262976 sec  
RG 256  
DW 41.600 usec  
DE 6.50 usec  
TE 299.7 K  
D1 1.00000000 sec  
TDO 1

==== CHANNEL f1 =====

SFO1 600.1329337 MHz  
NUC1 1H  
P1 13.70 usec  
PLW1 19.34000015 W

F2 - Processing parameters

SI 65536  
SF 600.1299929 MHz  
WDW EM  
SSB 0  
LB 0 Hz  
GB 0  
PC 1.00

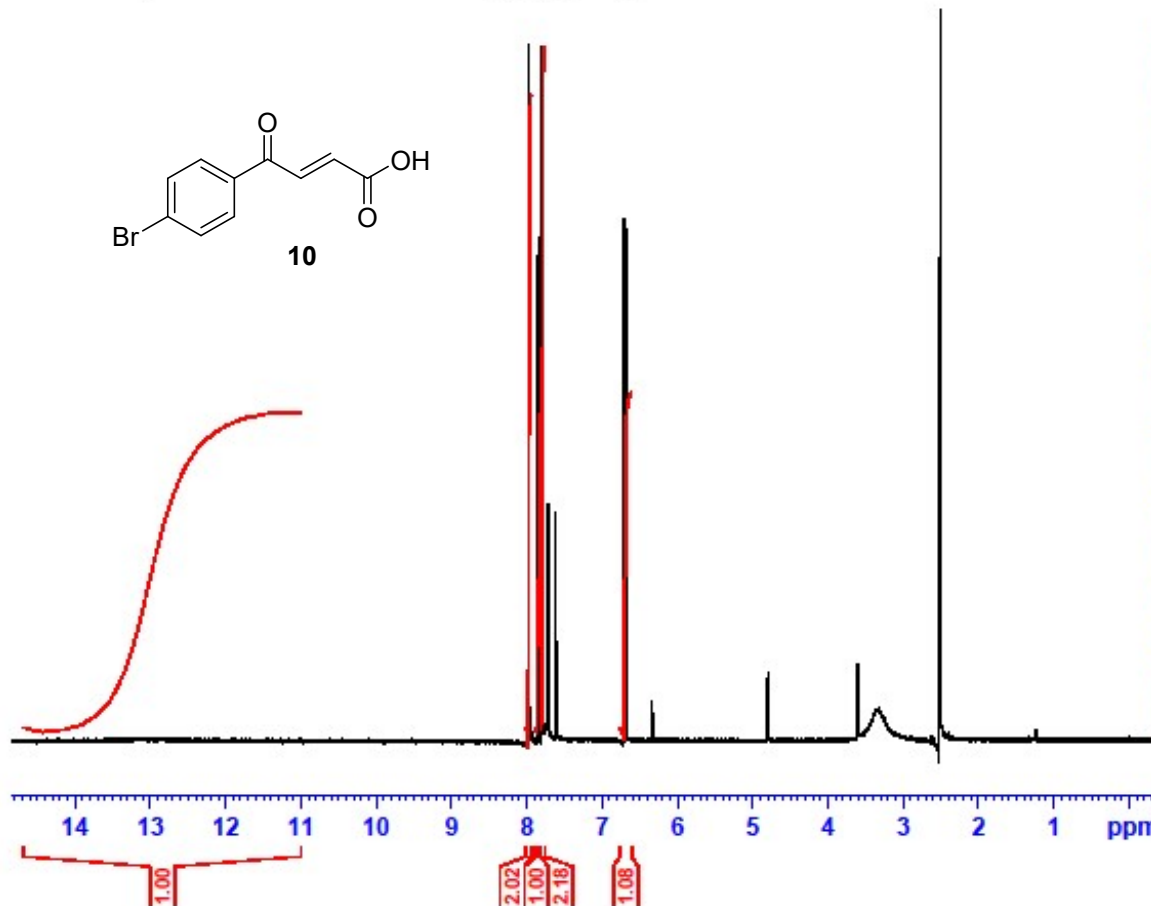

zqj-Aldol-11

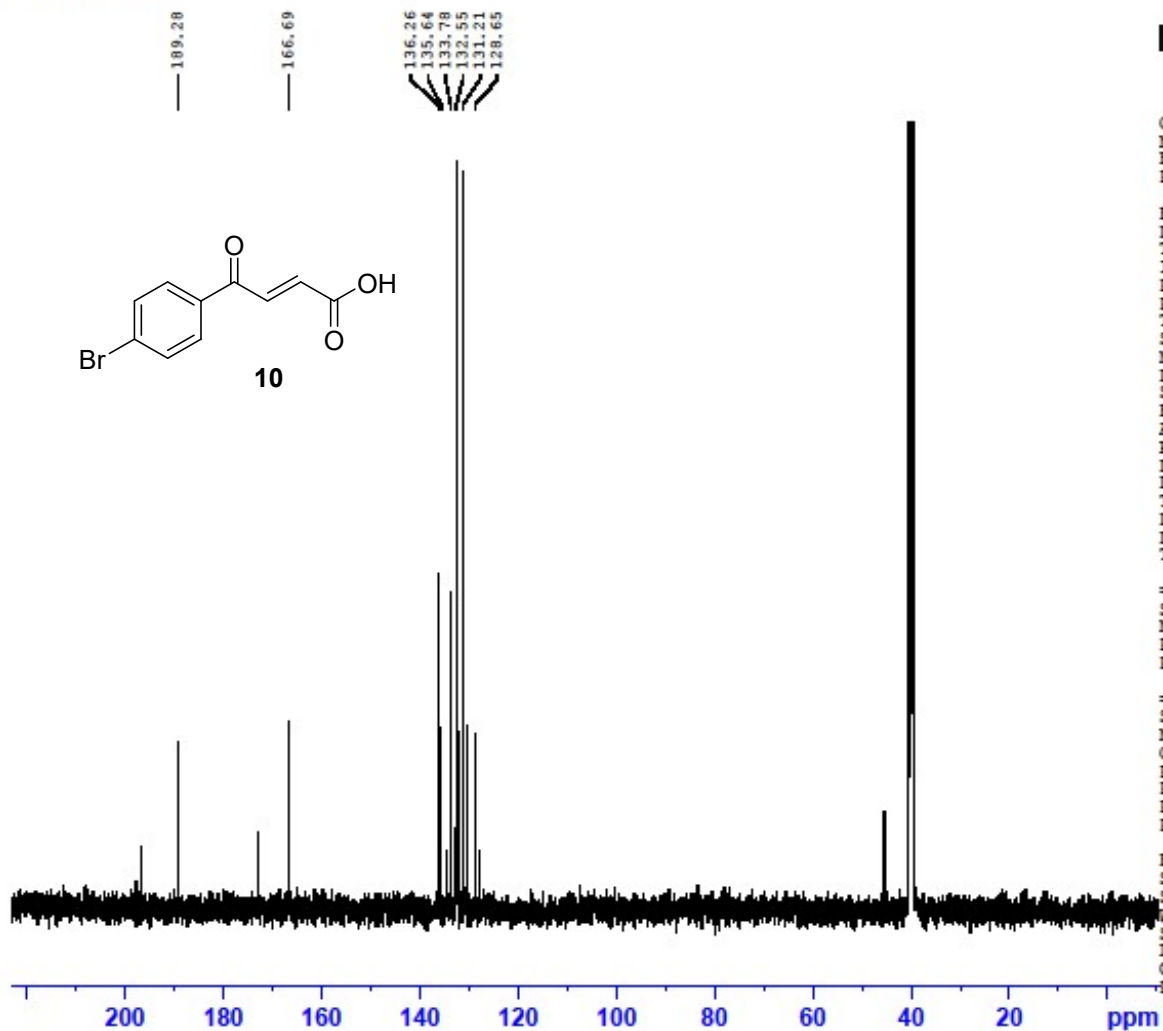

Current Data Parameters  
NAME zqj-Aldol-11  
EXPNO 2  
PROCNO 1

F2 - Acquisition Parameters

Date\_ 20210413  
Time 2.18  
INSTRUM spect  
PROBHD 5 mm PABBO BB-  
PULPROG zgpg30  
TD 37874  
SOLVENT DMSO  
NS 604  
DS 4  
SWH 37878.789 Hz  
FIDRES 1.000126 Hz  
AQ 0.4999368 sec  
RG 2050  
DW 13.200 usec  
DE 6.50 usec  
TE 301.0 K  
D1 1.00000000 sec  
D11 0.03000000 sec  
TDO 1

==== CHANNEL f1 =====

SFO1 150.9178990 MHz  
NUC1 13C  
P1 9.00 usec  
PLW1 41.50000000 W

==== CHANNEL f2 =====

SFO2 600.1324005 MHz  
NUC2 1H  
CPDPRG[2] waltz16  
PCPD2 70.00 usec  
PLW2 19.34000015 W  
PLW12 1.01040006 W  
PLW13 0.49509999 W

F2 - Processing parameters

SI 65536  
SF 150.9028112 MHz  
WDW EM  
SSB 0  
LB 3.00 Hz  
GB 0  
PC 1.40

zqj-Aldol-12

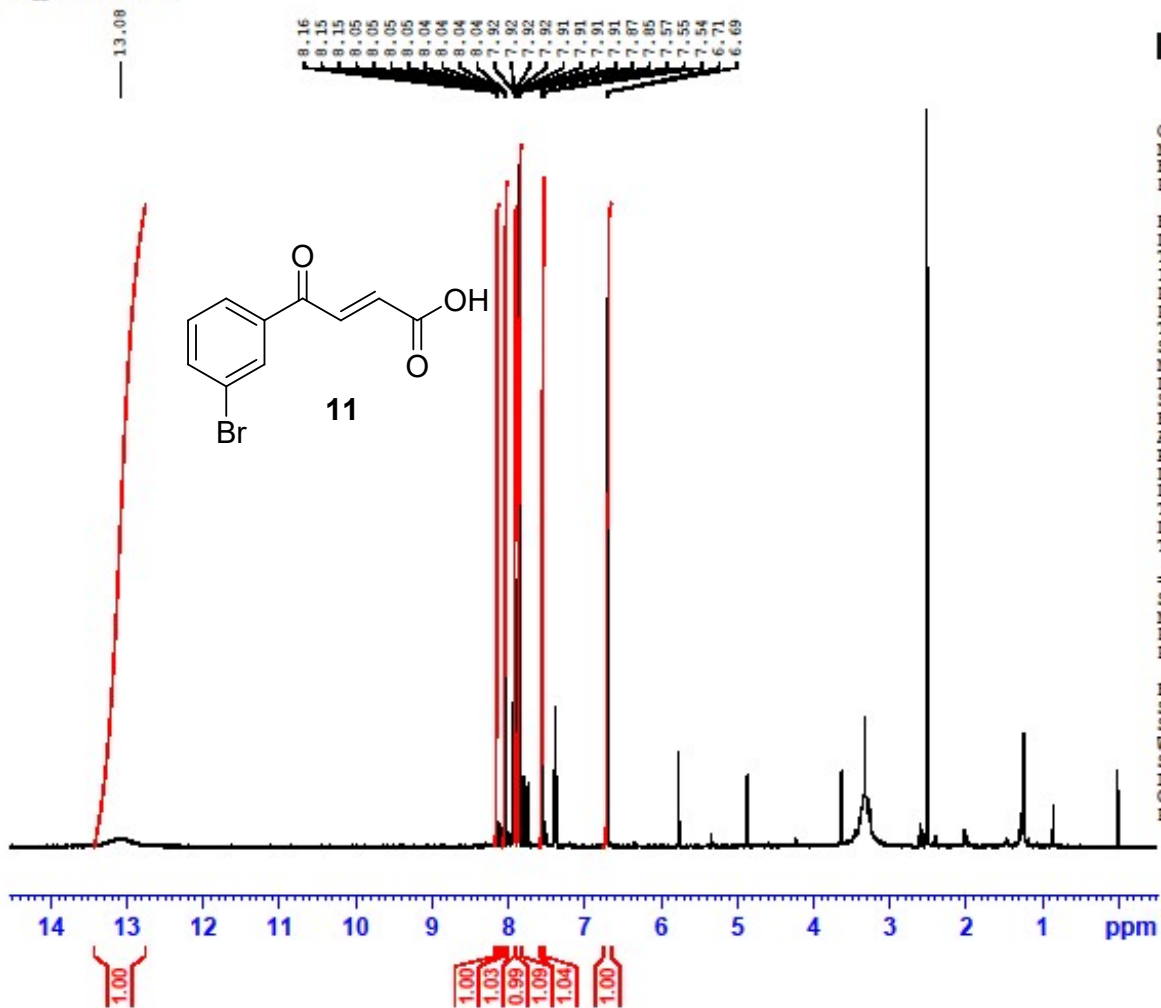

Current Data Parameters  
NAME zqj-Aldol-12  
EXPNO 1  
PROCNO 1

F2 - Acquisition Parameters  
Date\_ 20210419  
Time 6.44  
INSTRUM spect  
PROBHD 5 mm PABBO BB-  
PULPROG zg30  
TD 65536  
SOLVENT DMSO  
NS 16  
DS 0  
SWH 12019.230 Hz  
FIDRES 0.163399 Hz  
AQ 2.7262976 sec  
RG 322  
DW 41.600 usec  
DE 6.50 usec  
TE 300.0 K  
D1 1.00000000 sec  
TDO 1

==== CHANNEL f1 =====  
SF01 600.1329337 MHz  
NUC1 1H  
P1 13.70 usec  
PLW1 19.34000015 W

F2 - Processing parameters  
SI 65536  
SF 600.1299929 MHz  
WDW EM  
SSB 0  
LB 0 Hz  
GB 0  
PC 1.00

zqj-Aldol-12

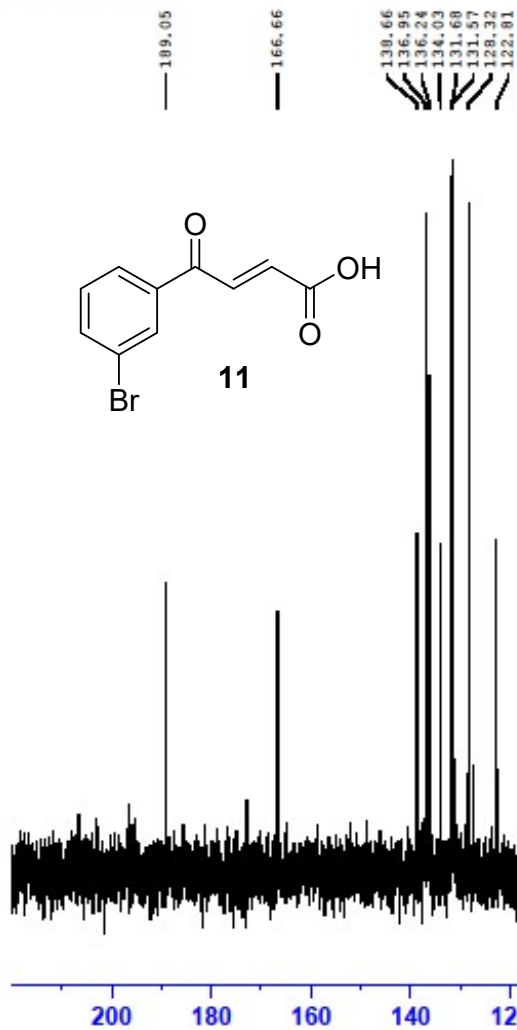

Current Data Parameters  
NAME sqj-Aldol-12  
EXPNO 2  
PROCNO 1

F2 - Acquisition Parameters  
Date\_ 20210419  
Time 7.01  
INSTRUM spect  
PROBHD 5 mm PABBO BB-  
PULPROG zgpg30  
TD 37874  
SOLVENT DMSO  
NS 907  
DS 4  
SWH 37878.789 Hz  
FIDRES 1.000126 Hz  
AQ 0.4999368 sec  
RG 2050  
DW 13.200 usec  
DE 6.50 usec  
TE 302.4 K  
D1 1.00000000 sec  
D11 0.03000000 sec  
TDO 1

===== CHANNEL f1 =====  
SFO1 150.9178990 MHz  
NUC1 13C  
P1 9.00 usec  
PLW1 41.50000000 W

===== CHANNEL f2 =====  
SFO2 600.1324005 MHz  
NUC2 1H  
CPDPRG2 waltz16  
PCPD2 70.00 usec  
PLW2 19.34000015 W  
PLW12 1.01040006 W  
PLW13 0.49509999 W

F2 - Processing parameters  
SI 65536  
SF 150.9028112 MHz  
WDW EM  
SSB 0  
LB 3.00 Hz  
GB 0  
PC 1.40

zqj-Aldol-1

13.06

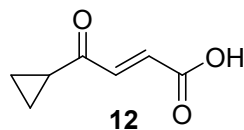

7.06  
7.03  
6.72  
6.69

2.51  
2.51  
2.51  
2.50  
2.50  
2.49  
2.49  
2.48  
2.47  
1.03  
1.03  
1.02  
1.01  
1.01  
1.01  
1.00  
1.00  
0.99

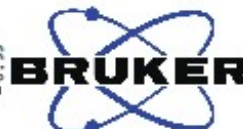

Current Data Parameters  
NAME zqj-Aldol-1  
EXPNO 1  
PROCNO 1

F2 - Acquisition Parameters  
Date\_ 20210412  
Time 12.21  
INSTRUM spect  
PROBHD 5 mm PABBO BB-  
PULPROG zg30  
TD 65536  
SOLVENT DMSO  
NS 16  
DS 0  
SWH 12019.230 Hz  
FIDRES 0.163399 Hz  
AQ 2.7262976 sec  
RG 128  
DW 41.600 usec  
DE 6.50 usec  
TE 298.9 K  
D1 1.00000000 sec  
TDO 1

==== CHANNEL f1 =====  
SF01 600.1329337 MHz  
NUC1 1H  
P1 13.70 usec  
PLW1 19.34000015 W

F2 - Processing parameters  
SI 65536  
SF 600.1299929 MHz  
WDW EM  
SSB 0  
LB 0 Hz  
GB 0  
PC 1.00

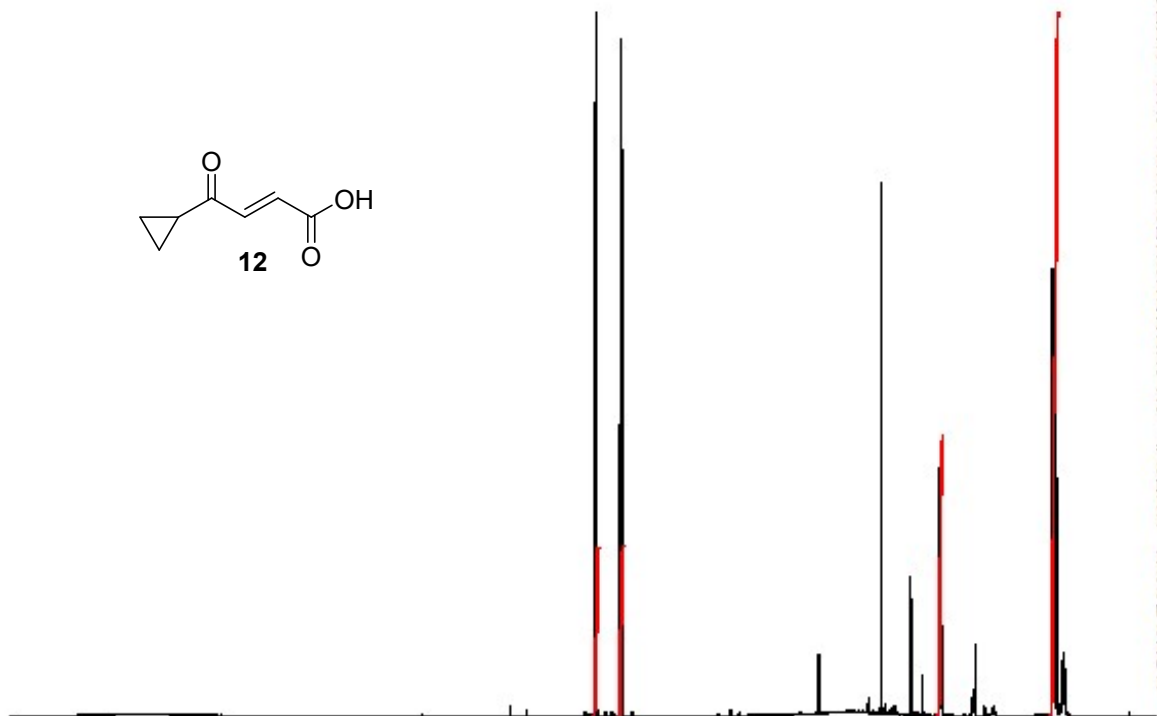

14 13 12 11 10 9 8 7 6 5 4 3 2 1 ppm

1.00 1.01 1.67 4.19



zqj-Aldol-1

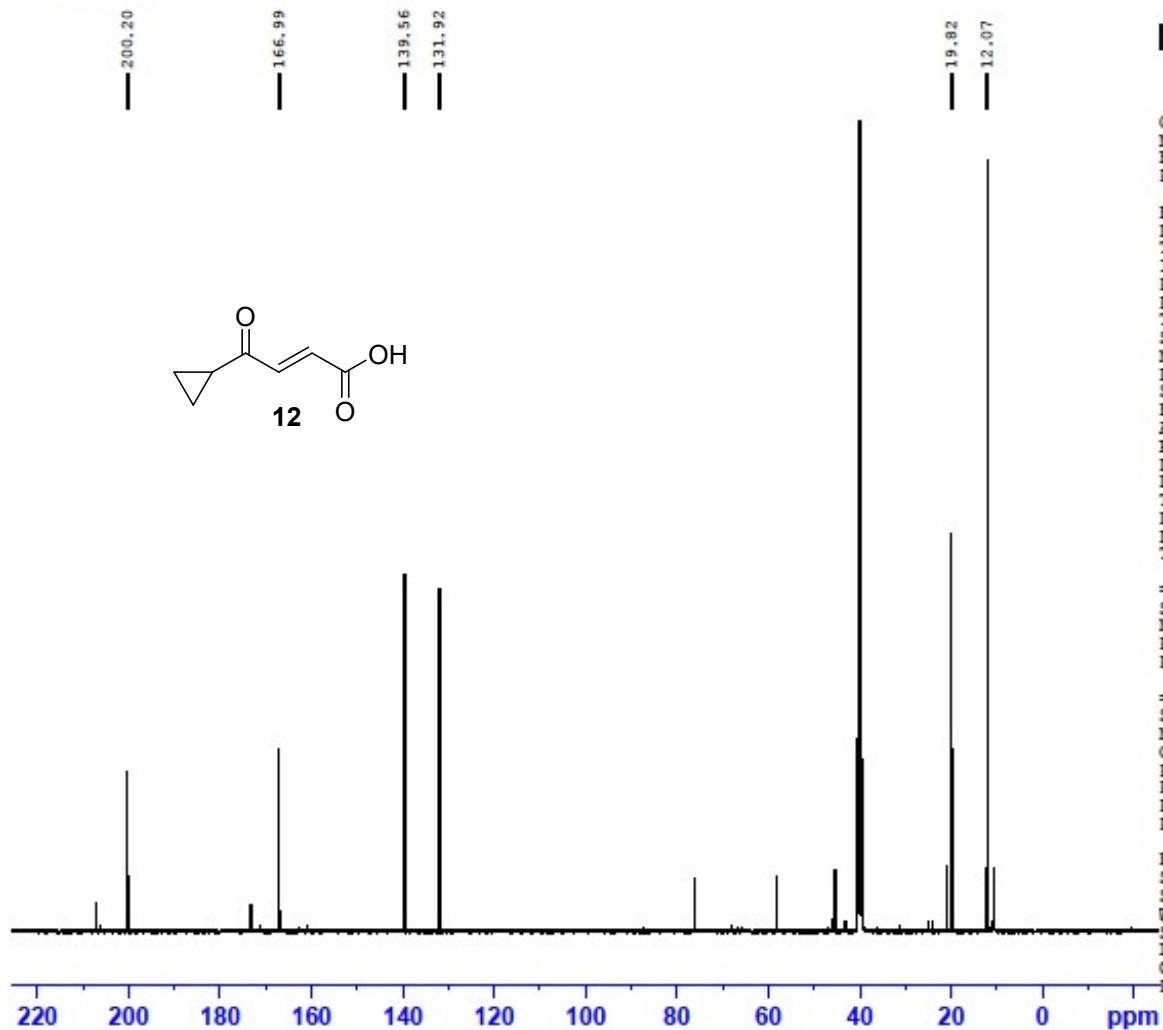

Current Data Parameters  
NAME zqj-Aldol-1  
EXPNO 2  
PROCNO 1

F2 - Acquisition Parameters

Date\_ 20210413  
Time 3.52  
INSTRUM spect  
PROBHD 5 mm PABBO BB-  
PULPROG zgpg30  
TD 37874  
SOLVENT DMSO  
NS 2175  
DS 4  
SWH 37878.789 Hz  
FIDRES 1.000126 Hz  
AQ 0.4999368 sec  
RG 2050  
DW 13.200 usec  
DE 6.50 usec  
TE 301.9 K  
D1 1.00000000 sec  
D11 0.03000000 sec  
TDO 1

==== CHANNEL f1 =====

SFO1 150.9178990 MHz  
NUC1 13C  
P1 9.00 usec  
PLW1 41.50000000 W

==== CHANNEL f2 =====

SFO2 600.1324005 MHz  
NUC2 1H  
CPDPRG2 waltz16  
PCPD2 70.00 usec  
PLW2 19.34000015 W  
PLW12 1.01040006 W  
PLW13 0.49509999 W

F2 - Processing parameters

SI 65536  
SF 150.9028112 MHz  
WDW EM  
SSB 0  
LB 3.00 Hz  
GB 0  
PC 1.40

zqj-Aldol-4

13.09

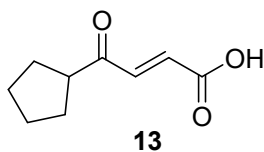

7.00  
6.97  
6.64  
6.61  
3.34  
3.32  
3.32  
3.31  
3.31  
3.31  
3.30  
3.29  
3.28  
1.85  
1.84  
1.83  
1.83  
1.82  
1.81  
1.81  
1.81  
1.80  
1.80  
1.79  
1.79  
1.70  
1.69  
1.69  
1.69  
1.68  
1.68  
1.67  
1.66  
1.66

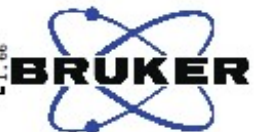

Current Data Parameters  
NAME zqj-Aldol-4  
EXPNO 1  
PROCNO 1

F2 - Acquisition Parameters  
Date\_ 20210415  
Time 9.22  
INSTRUM spect  
PROBHD 5 mm PABBO BB-  
PULPROG zg30  
TD 65536  
SOLVENT DMSO  
NS 16  
DS 0  
SWH 12019.230 Hz  
FIDRES 0.183399 Hz  
AQ 2.7262976 sec  
RG 287  
DW 41.600 usec  
DE 6.50 usec  
TE 300.1 K  
D1 1.00000000 sec  
TDO 1

==== CHANNEL f1 =====  
SF01 600.1329337 MHz  
NUC1 1H  
P1 13.70 usec  
PLW1 19.34000015 W

F2 - Processing parameters  
SI 65536  
SF 600.1299929 MHz  
WDW EM  
SSB 0  
LB 0 Hz  
GB 0  
PC 1.00

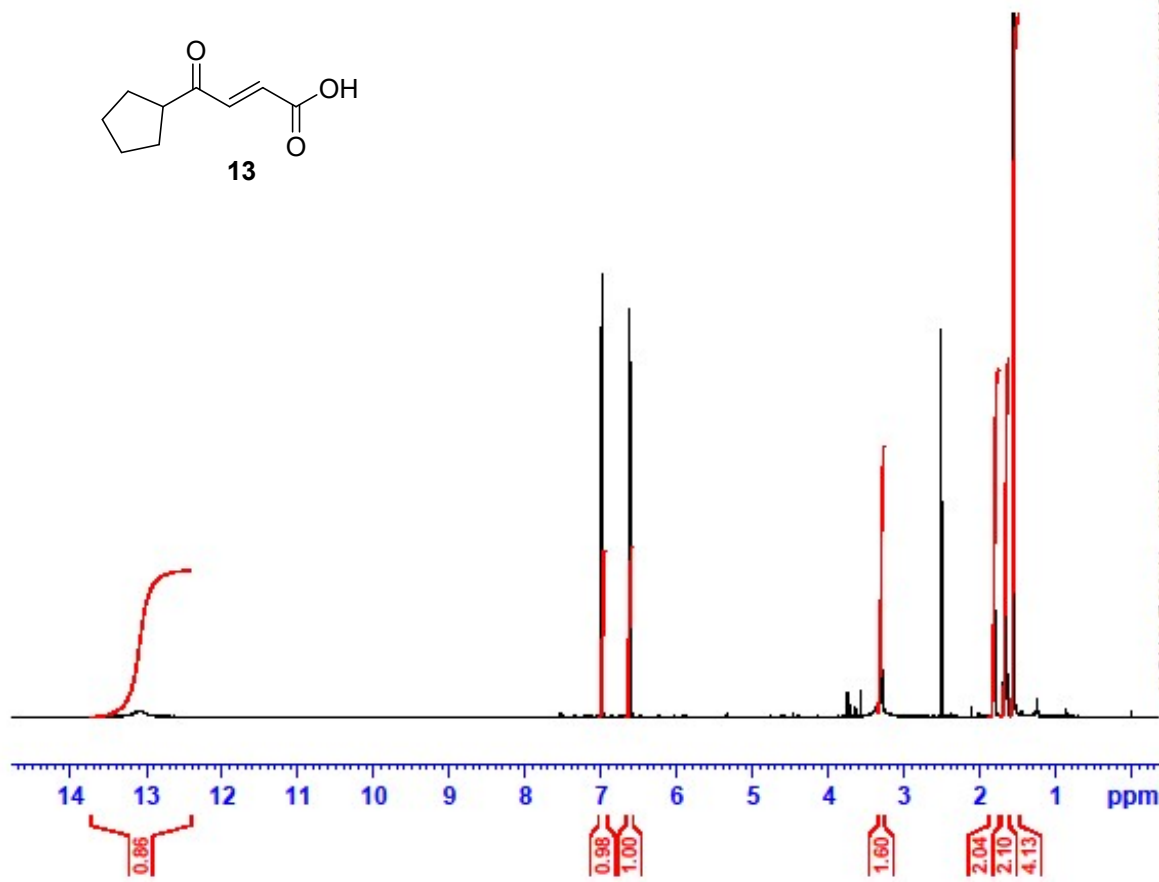

zqj-Aldol-4

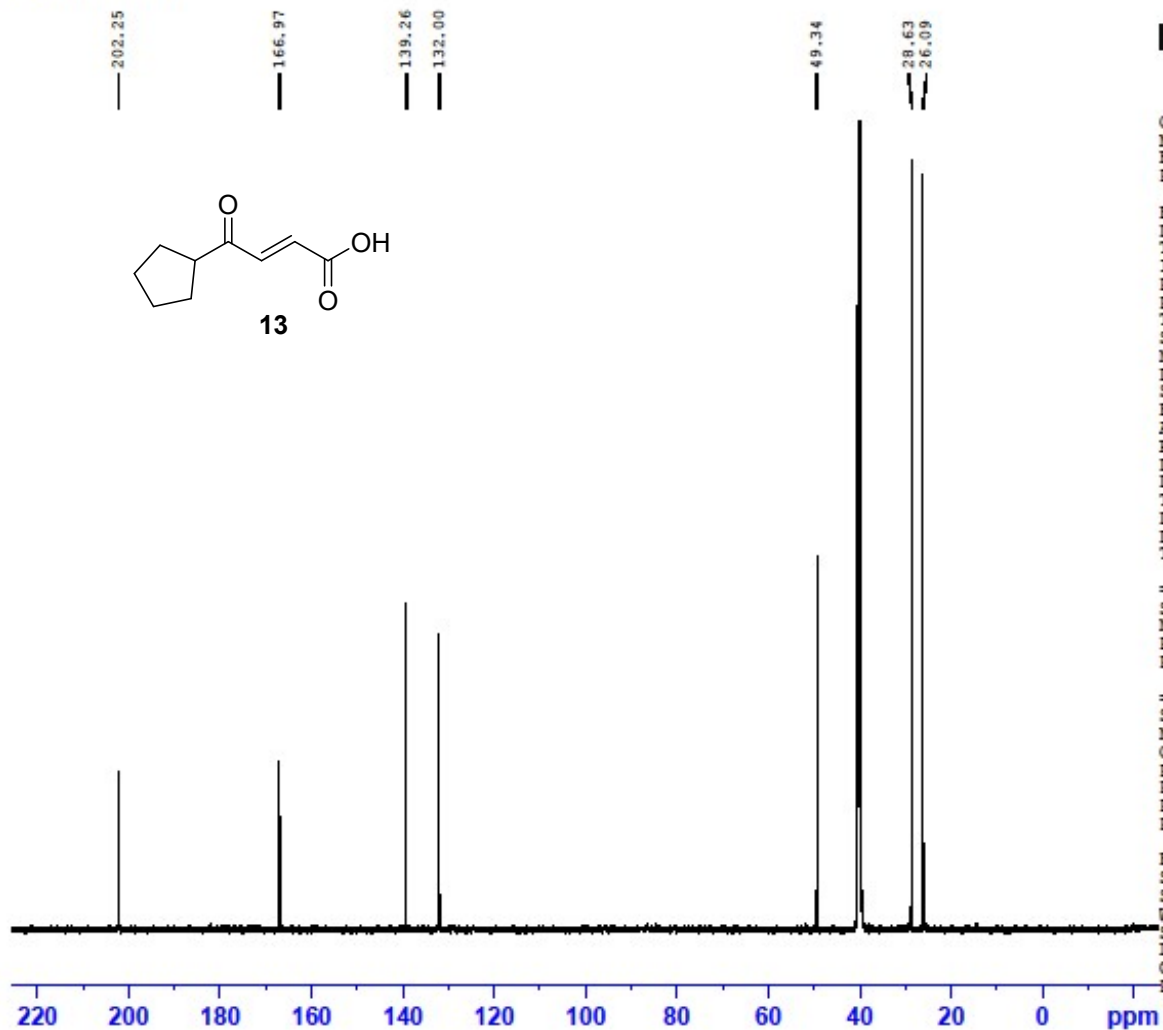

Current Data Parameters  
NAME zqj-Aldol-4  
EXPNO 2  
PROCNO 1

F2 - Acquisition Parameters  
Date\_ 20210415  
Time 15.57  
INSTRUM spect  
PROBHD 5 mm PABBO BB-  
PULPROG zgpg30  
TD 37874  
SOLVENT DMSO  
NS 5556  
DS 4  
SWH 37878.789 Hz  
FIDRES 1.000126 Hz  
AQ 0.4999368 sec  
RG 2050  
DW 13.200 usec  
DE 6.50 usec  
TE 302.4 K  
D1 1.00000000 sec  
D11 0.03000000 sec  
TDO 1

===== CHANNEL f1 =====  
SFO1 150.9178990 MHz  
NUC1 13C  
P1 9.00 usec  
PLW1 41.50000000 W

===== CHANNEL f2 =====  
SFO2 600.1324005 MHz  
NUC2 1H  
CPDPRG[2] waltz16  
PCPD2 70.00 usec  
PLW2 19.34000015 W  
PLW12 1.01040006 W  
PLW13 0.49509999 W

F2 - Processing parameters  
SI 65536  
SF 150.9028112 MHz  
WDW EM  
SSB 0  
LB 3.00 Hz  
GB 0  
PC 1.40

Compound 6

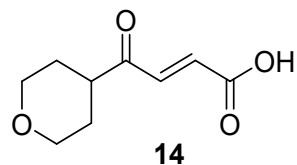

7.09  
7.06  
6.64  
6.60  
3.89  
3.89  
3.88  
3.88  
3.87  
3.86  
3.44  
3.44  
3.42  
3.42  
3.40  
3.39  
2.96  
2.96  
2.95  
2.94  
2.93  
2.93  
2.92  
2.91  
2.90  
1.72  
1.69  
1.69  
1.58  
1.57  
1.55

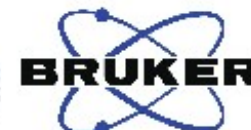

Current Data Parameters  
NAME MU-666-103-F3  
EXPNO 10  
PROCNO 1

F2 - Acquisition Parameters

Date\_ 20200129  
Time 10.32  
INSTRUM spect  
PROBHD 5 mm PABBO BB-  
PULPROG zg30  
TD 65536  
SOLVENT MeOD  
NS 16  
DS 0  
SWH 10330.578 Hz  
FIDRES 0.157632 Hz  
AQ 3.1719425 sec  
RG 101  
DW 48.400 usec  
DE 12.02 usec  
TE 291.1 K  
D1 1.00000000 sec  
TDO 1

===== CHANNEL f1 =====  
SF01 500.3030896 MHz  
NUC1 1H  
P1 16.10 usec  
PLW1 19.50000000 W

F2 - Processing parameters

SF 500.3000000 MHz  
WDW EM  
SSB 0  
LB 0.30 Hz  
GB 0  
PC 1.00

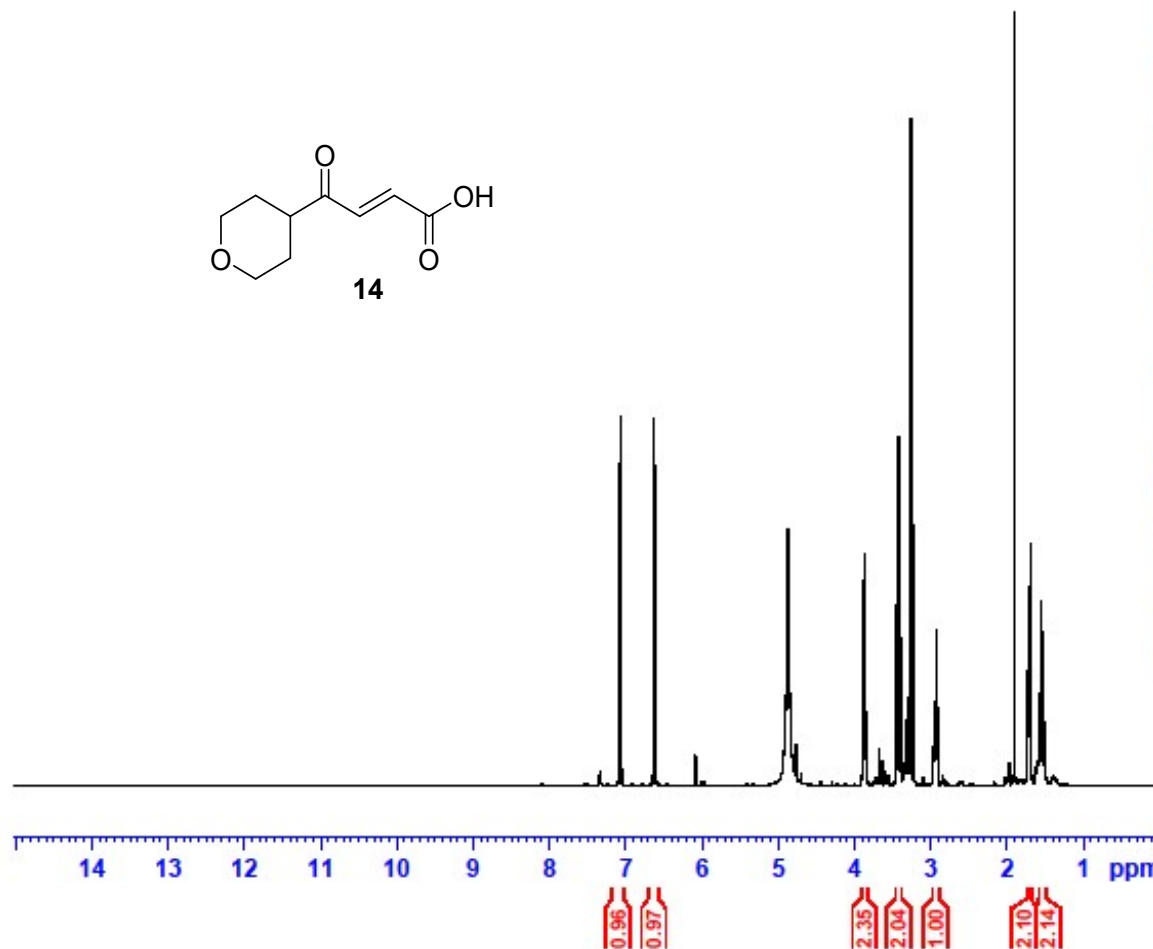

Compound 6

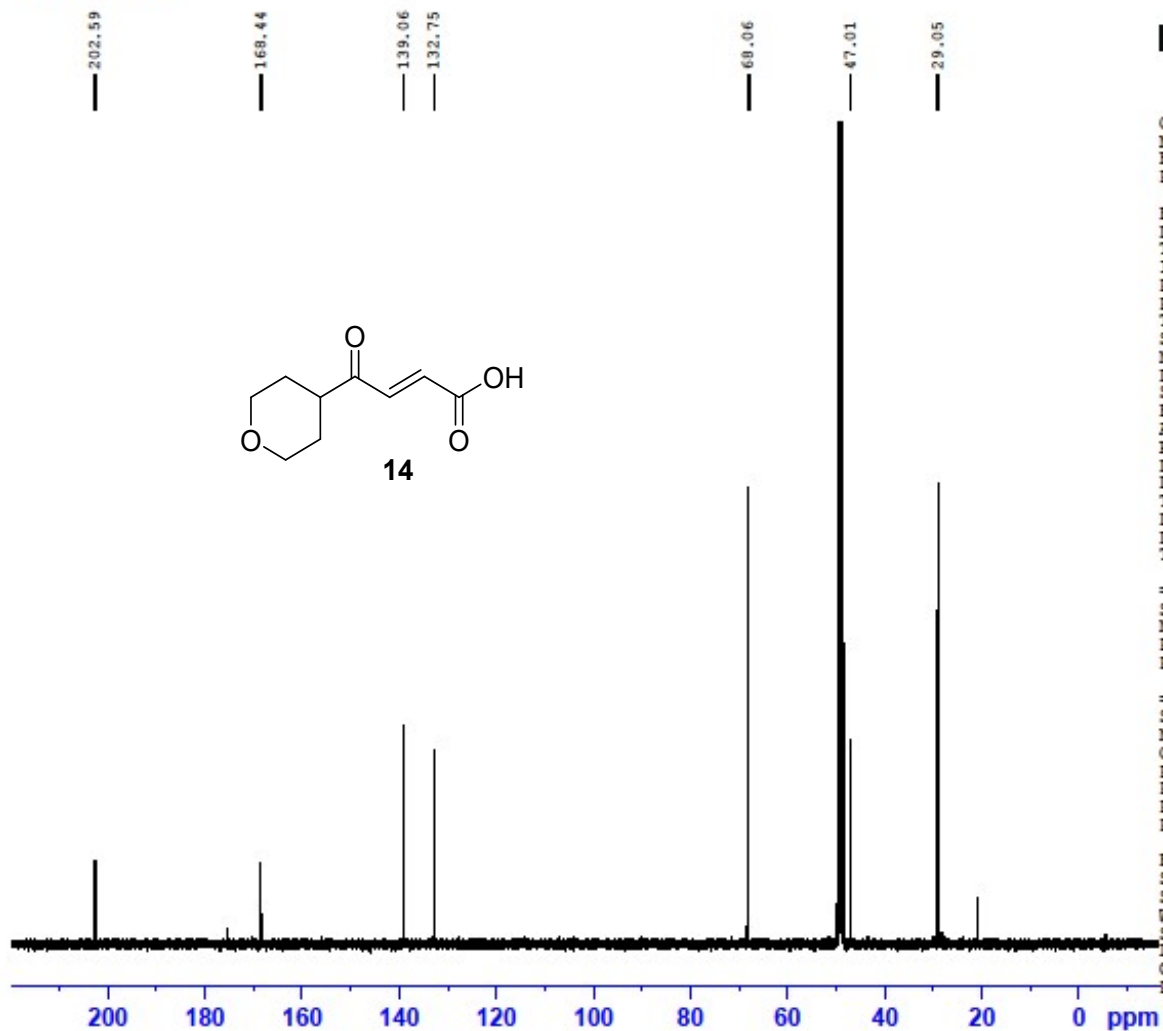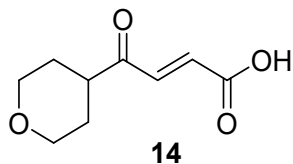

Current Data Parameters  
NAME MU-666-103-F3  
EXPNO 11  
PROCNO 1

F2 - Acquisition Parameters

Date\_ 20200129  
Time\_ 14.45  
INSTRUM spect  
PROBHD 5 mm PABBO BB-  
PULPROG zgpg30  
TD 65536  
SOLVENT MeOD  
NS 256  
DS 2  
SWH 29761.904 Hz  
FIDRES 0.454131 Hz  
AQ 1.1010048 sec  
RG 456  
DW 16.800 usec  
DE 7.65 usec  
TE 294.3 K  
D1 2.00000000 sec  
D11 0.03000000 sec  
TDO 1

==== CHANNEL f1 =====

SFO1 125.8131151 MHz  
NUC1 13C  
P1 9.90 usec  
PLW1 82.38999939 W

==== CHANNEL f2 =====

SFO2 500.3020012 MHz  
NUC2 1H  
CPDPRG2 waltz16  
PCPD2 80.00 usec  
PLW2 19.50000000 W  
PLW12 0.78978002 W  
PLW13 0.39725000 W

F2 - Processing parameters

SI 65536  
SF 125.8005350 MHz  
WDW EM  
SSB 0  
LB 1.00 Hz  
GB 0  
PC 1.40

Compound 8

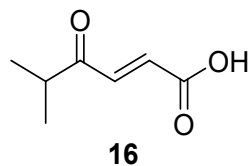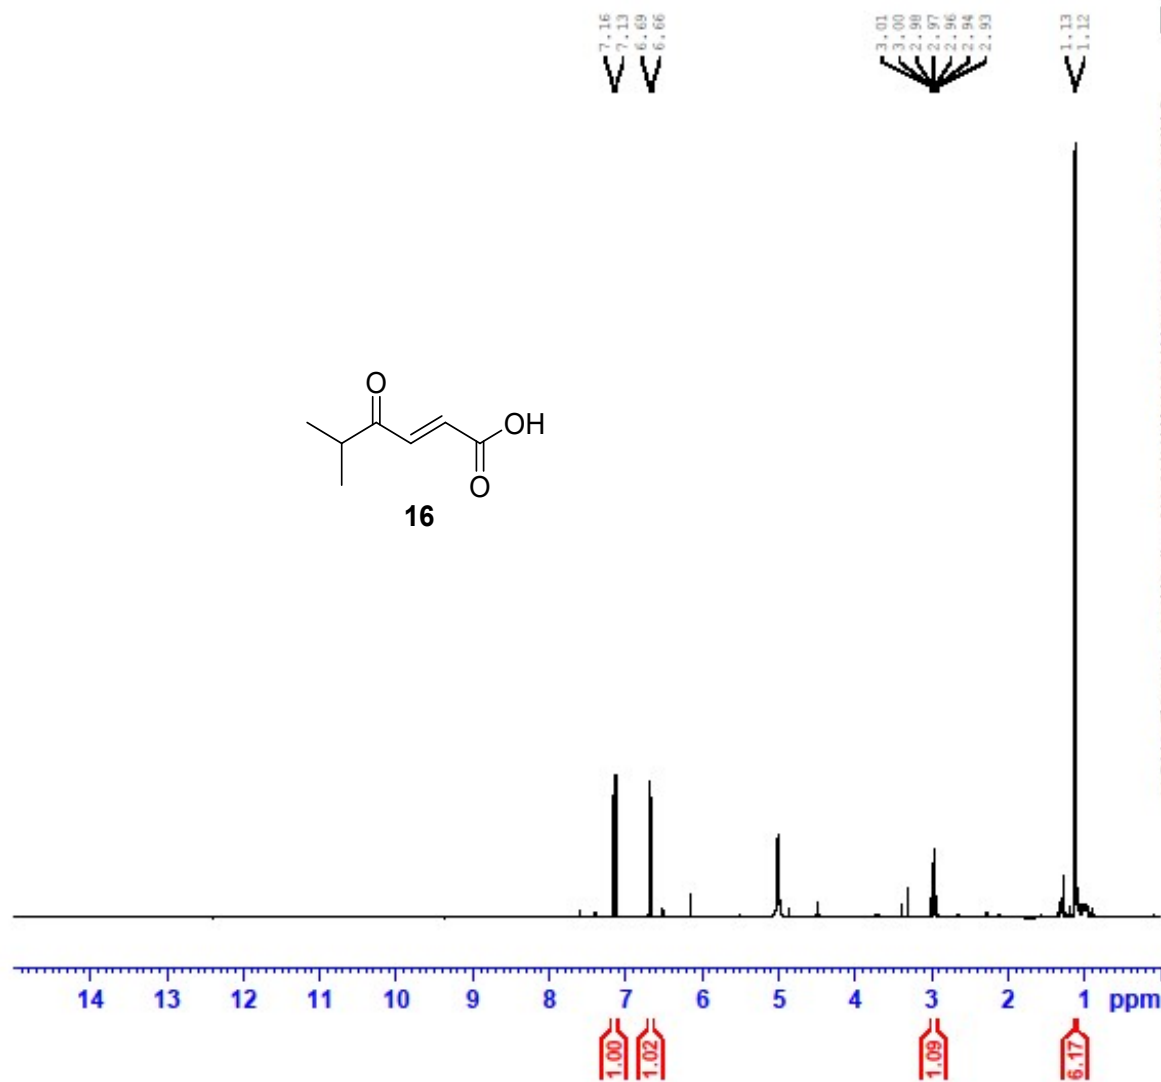

Current Data Parameters  
NAME MU-666-153-F23  
EXPNO 10  
PROCNO 1

F2 - Acquisition Parameters

Date\_ 20200707  
Time\_ 19.46  
INSTRUM spect  
PROBHD 5 mm F4BBO BB-  
PULPROG zg30  
TD 65536  
SOLVENT MeOD  
NS 16  
DS 0  
SWH 10330.578 Hz  
FIDRES 0.157632 Hz  
AQ 3.1719425 sec  
RG 64  
DW 48.400 usec  
DE 12.02 usec  
TE 294.5 K  
D1 1.00000000 sec  
TDO 1

===== CHANNEL f1 =====  
SF01 500.3030896 MHz  
NUC1 1H  
P1 16.10 usec  
PLW1 19.50000000 W

F2 - Processing parameters

SF 500.3000588 MHz  
WDW EM  
SSB 0  
LB 0.30 Hz  
GB 0  
PC 1.00

Compound 8

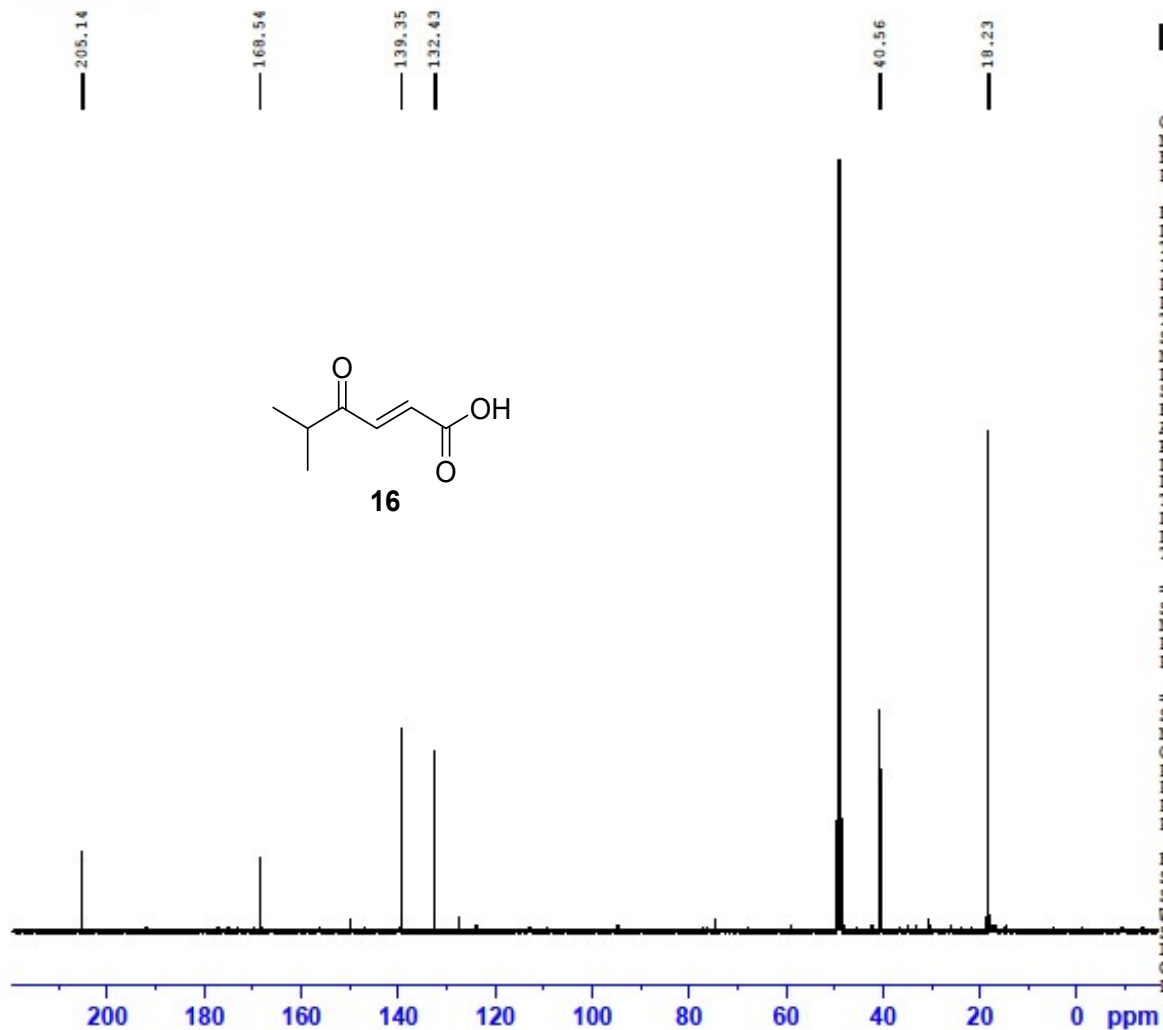

Current Data Parameters  
NAME MU-666-153-F23  
EXPNO 11  
PROCNO 1

F2 - Acquisition Parameters

Date\_ 20200708  
Time 16.42  
INSTRUM spect  
PROBHD 5 mm PABBO BB-  
PULPROG zgpg30  
TD 65536  
SOLVENT MeOD  
NS 256  
DS 2  
SWH 29761.904 Hz  
FIDRES 0.454131 Hz  
AQ 1.1010048 sec  
RG 456  
DW 16.800 usec  
DE 7.65 usec  
TE 297.3 K  
D1 2.00000000 sec  
D11 0.03000000 sec  
TDO 1

==== CHANNEL f1 =====

SFO1 125.8131151 MHz  
NUC1 13C  
P1 9.90 usec  
PLW1 82.38999939 W

==== CHANNEL f2 =====

SFO2 500.3020012 MHz  
NUC2 1H  
CPDPRG[2] waltz16  
PCPD2 80.00 usec  
PLW2 19.50000000 W  
PLW12 0.78978002 W  
PLW13 0.39725000 W

F2 - Processing parameters

SI 65536  
SF 125.8005350 MHz  
WDW EM  
SSB 0  
LB 1.00 Hz  
GB 0  
PC 1.40

zqj-Aldol-2

13.10

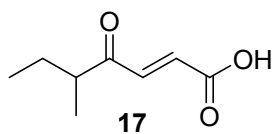

7.07  
7.05  
6.64  
6.61

2.92  
2.91  
2.90  
2.89  
2.88  
2.87  
1.67  
1.66  
1.65  
1.64  
1.63  
1.62  
1.61  
1.60  
1.40  
1.39  
1.38  
1.37  
1.36  
1.35

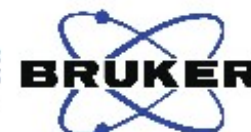

Current Data Parameters  
NAME zqj-Aldol-2  
EXPNO 1  
PROCNO 1

F2 - Acquisition Parameters  
Date\_ 20210413  
Time 4.40  
INSTRUM spect  
PROBHD 5 mm PABBO BB-  
PULPROG zg30  
TD 65536  
SOLVENT DMSO  
NS 16  
DS 0  
SWH 12019.230 Hz  
FIDRES 0.163399 Hz  
AQ 2.7262976 sec  
RG 181  
DW 41.600 usec  
DE 6.50 usec  
TE 299.9 K  
D1 1.00000000 sec  
TDO 1

==== CHANNEL f1 =====  
SF01 600.1329337 MHz  
NUC1 1H  
P1 13.70 usec  
PLW1 19.34000015 W

F2 - Processing parameters  
SI 65536  
SF 600.1299929 MHz  
WDW EM  
SSB 0  
LB 0 Hz  
GB 0  
PC 1.00

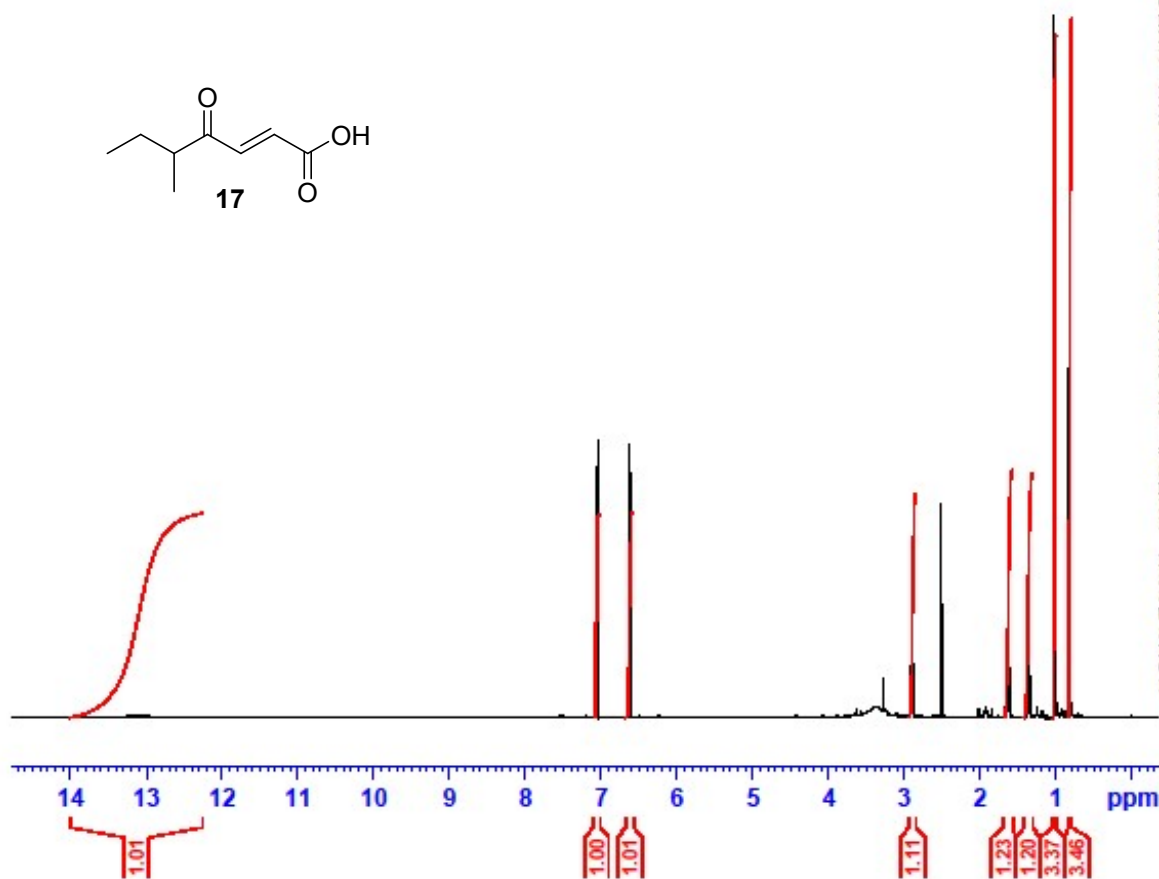



zqj-Aldol-2

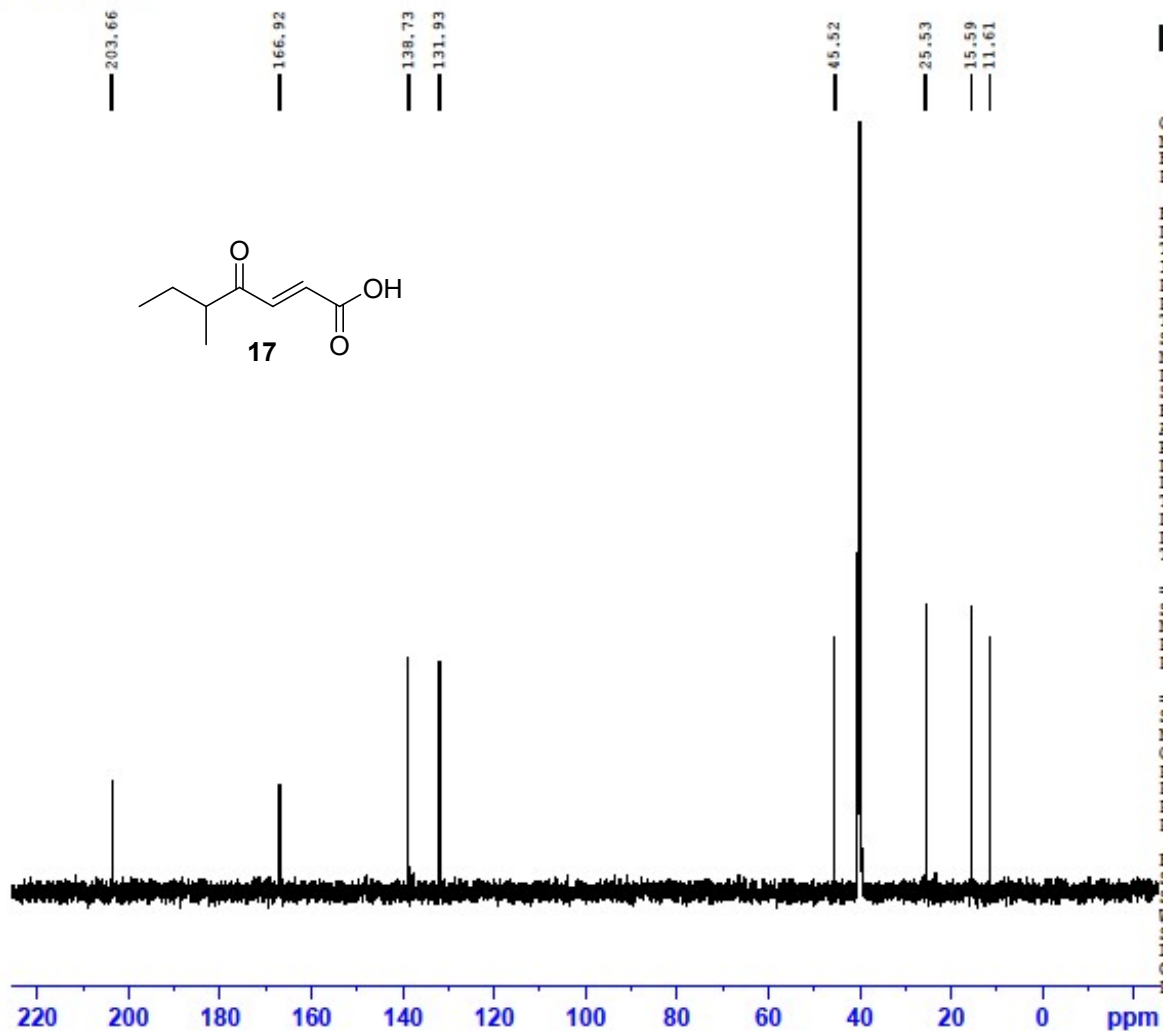

Current Data Parameters  
NAME zqj-Aldol-2  
EXPNO 2  
PROCNO 1

F2 - Acquisition Parameters

Date\_ 20210413  
Time 4.47  
INSTRUM spect  
PROBHD 5 mm PABBO BB-  
PULPROG zgpg30  
TD 37874  
SOLVENT DMSO  
NS 185  
DS 4  
SWH 37878.789 Hz  
FIDRES 1.000126 Hz  
AQ 0.4999368 sec  
RG 2050  
DW 13.200 usec  
DE 6.50 usec  
TE 301.7 K  
D1 1.00000000 sec  
D11 0.03000000 sec  
TDO 1

===== CHANNEL f1 =====

SFO1 150.9178990 MHz  
NUC1 13C  
P1 9.00 usec  
PLW1 41.50000000 W

===== CHANNEL f2 =====

SFO2 600.1324005 MHz  
NUC2 1H  
CPDPRG[2] waltz16  
PCPD2 70.00 usec  
PLW2 19.34000015 W  
PLW12 1.01040006 W  
PLW13 0.49509999 W

F2 - Processing parameters

SI 65536  
SF 150.9028112 MHz  
WDW EM  
SSB 0  
LB 3.00 Hz  
GB 0  
PC 1.40

Compound 19

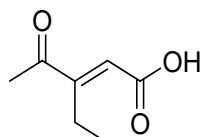

19

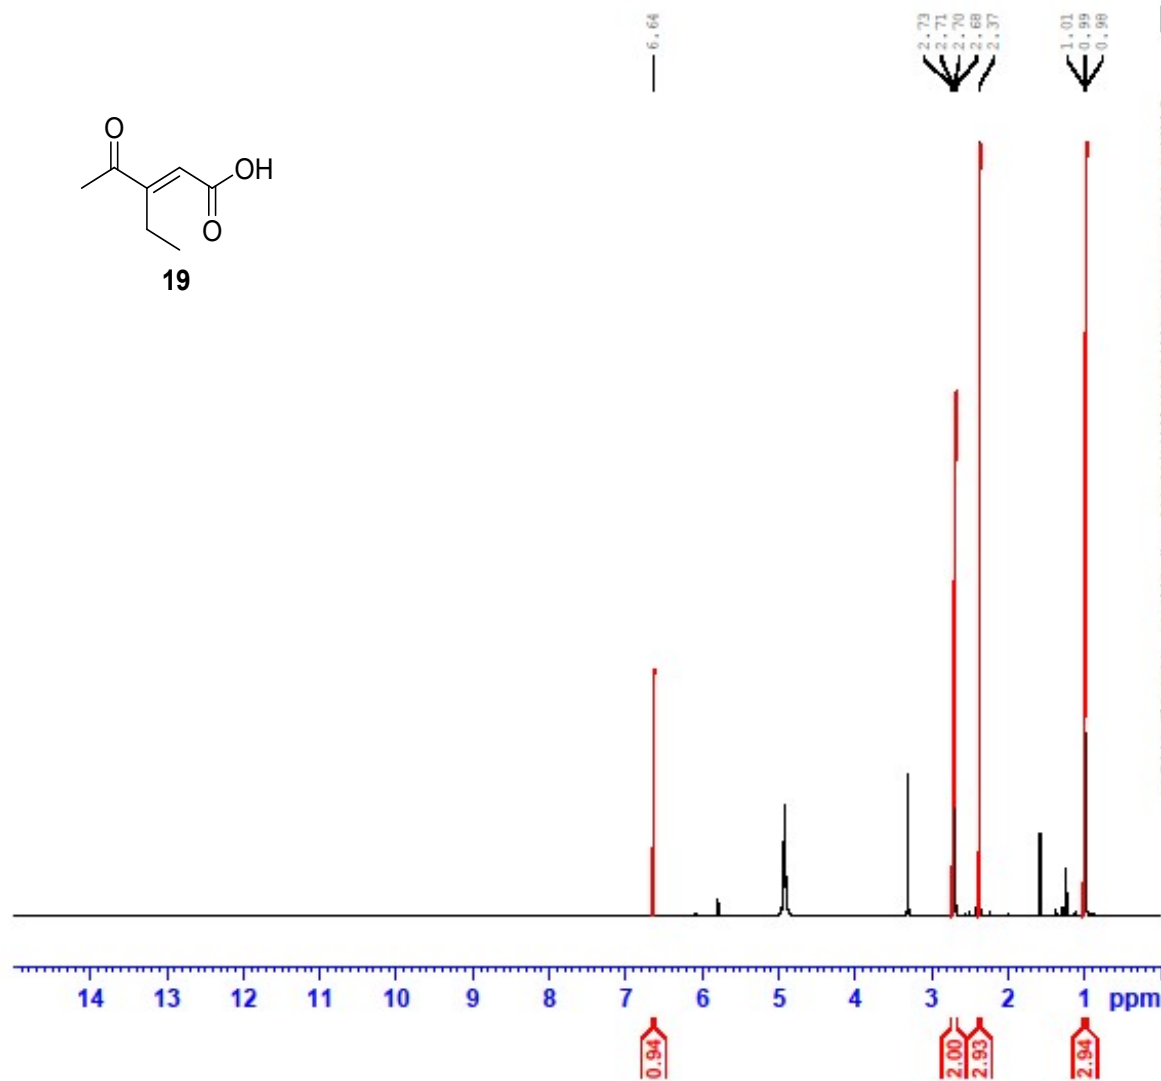

Current Data Parameters  
NAME MU-666-121-F2-A  
EXPNO 20  
PROCNO 1

F2 - Acquisition Parameters  
Date\_ 20200214  
Time 1.31  
INSTRUM spect  
PROBHD 5 mm PABBO BB-  
PULPROG zg30  
TD 65536  
SOLVENT MeOD  
NS 16  
DS 0  
SWH 10330.578 Hz  
FIDRES 0.157632 Hz  
AQ 3.1719425 sec  
RG 287  
DW 48.400 usec  
DE 12.02 usec  
TE 292.6 K  
D1 1.00000000 sec  
TDO 1

===== CHANNEL f1 =====  
SF01 500.3030896 MHz  
NUC1 1H  
P1 16.10 usec  
PLW1 19.50000000 W

F2 - Processing parameters  
SI 65536  
SF 500.3000000 MHz  
WDW EM  
SSB 0  
LB 0.30 Hz  
GB 0  
PC 1.00

Compound 19

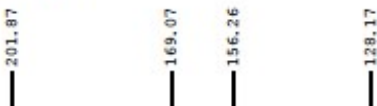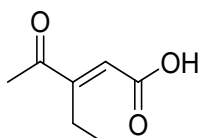

19

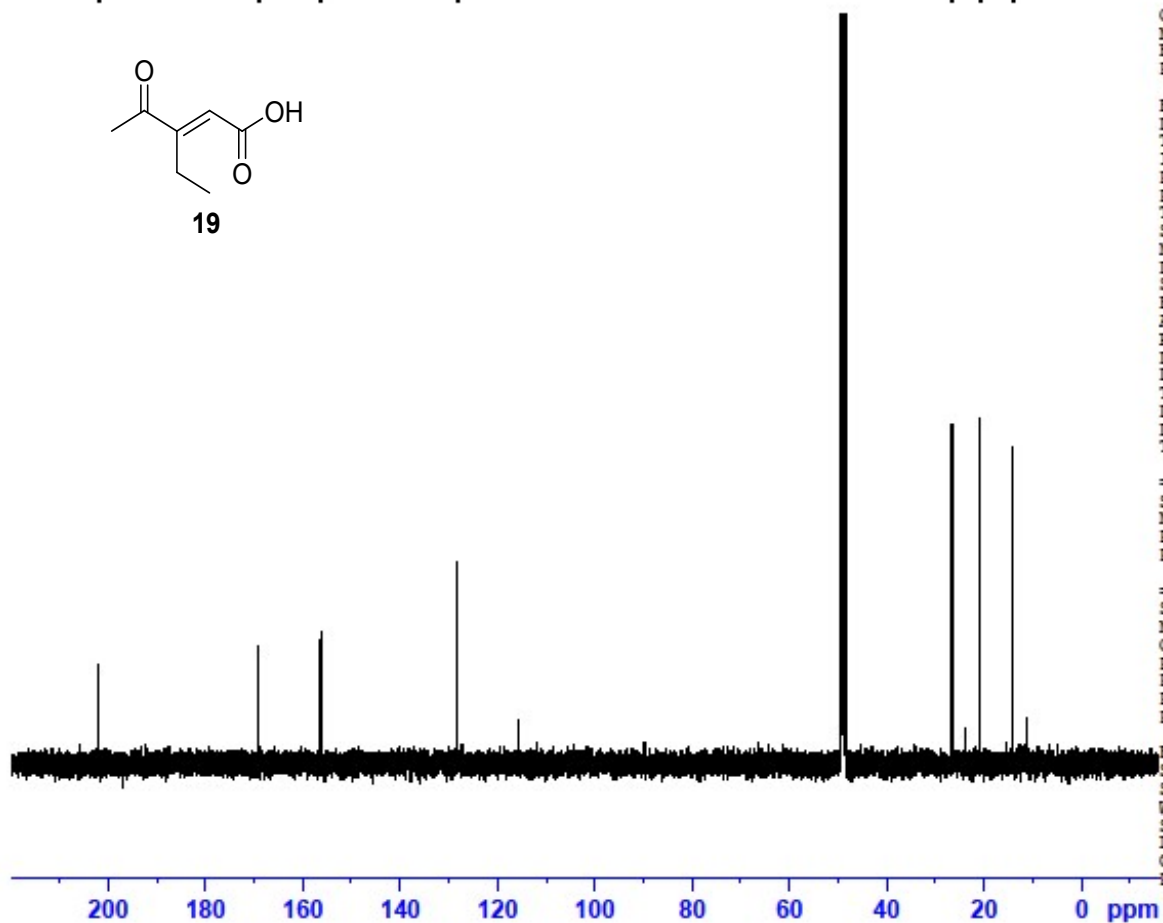

Current Data Parameters  
NAME MU-666-121-F2-A  
EXPNO 21  
PROCNO 1

F2 - Acquisition Parameters  
Date\_ 20200214  
Time 1.49  
INSTRUM spect  
PROBHD 5 mm PABBO BB-  
PULPROG zgpg30  
TD 65536  
SOLVENT MeOD  
NS 256  
DS 2  
SWH 29761.904 Hz  
FIDRES 0.454131 Hz  
AQ 1.1010048 sec  
RG 456  
DW 16.800 usec  
DE 7.65 usec  
TE 295.6 K  
D1 2.00000000 sec  
D11 0.03000000 sec  
TDO 1

===== CHANNEL f1 =====  
SFO1 125.8131151 MHz  
NUC1 13C  
P1 9.90 usec  
PLW1 82.38999939 W

===== CHANNEL f2 =====  
SFO2 500.3020012 MHz  
NUC2 1H  
CPDPRG2 walts16  
PCPD2 80.00 usec  
PLW2 19.50000000 W  
PLW12 0.78978002 W  
PLW13 0.39725000 W

F2 - Processing parameters  
SI 65536  
SF 125.8003597 MHz  
WDW EM  
SSB 0  
LB 1.00 Hz  
GB 0  
PC 1.40
